# Supplementary material for: Tcf7 Is an Important Regulator of the Switch of Self-Renewal and Differentiation in a Multipotential Hematopoietic Cell Line
Source: PLoS Genet. 2012 Mar 8;8(3):e1002565. doi: 10.1371/journal.pgen.1002565 (PMC3297581; doi:10.1371/journal.pgen.1002565)
Supplement: Dataset S1 — RNA–Seq gene expression values from each replica of CD34+ and CD34− cells. (XLS) [file pgen.1002565.s008.xls]

## Sheet: EML.Seq.Affy.All.Multis
genesymbol	geneID	CD34pos.75bp_TechRep1	CD34pos.75bp_TechRep2	CD34neg.75bp_TechRep1	CD34neg.75bp_TechRep2	CD34pos.35bp_TechRep1	CD34pos.35bp_TechRep2	CD34neg.35bp_TechRep1	CD34neg.35bp_TechRep2	logratio	sd	logratio.means
RP23-273B19.1	100008564	0.09	0.07	0.07	0.07	0.67	0.6	0.68	0.66	-0.0397193	0.0659635	-0.049582
Glp1	100009600	0.05	0.05	0.05	0	0.1	0.16	0.05	0.1	0.169518	0.339036	0
ENSMUSG00000070600	100009609	0	0	0	0	0	0	0	0	NA	NA	NA
LOC100009698	100009698	0.48	0.25	0.22	0.07	0.48	0.35	0.44	0.31	0.687019	0.625232	0.584963
Oog3	100012	0	0	0	0	0	0	0	0	NA	NA	NA
Ldlrap1	100017	23.63	24.58	59.81	60.14	23.5	24.58	59.88	60.7	-1.32106	0.027994	-1.32076
Mdn1	100019	1.55	1.44	2.69	2.59	1.66	1.43	2.74	2.57	-0.802742	0.0583472	-0.800559
LOC100033452	100033452	55.03	59.13	48.09	51.22	489.83	471.06	380.35	380.66	0.268506	0.0817631	0.321458
9830148g24rik	100033459	0	0	0	0	0.03	0	0	0	NA	NA	NA
RP23-430I21.1	100034251	0	0.12	0	0	0	0	0	0	NA	NA	NA
Mfap1b	100034361	0.23	0.2	0.3	0.25	17.37	16.43	19.63	17.93	-0.251941	0.120704	-0.154908
LOC100034363	100034363	0	0	0	0	0.07	0	0.07	0	0	0	0
LOC100034662	100034662	0.31	0.37	0.39	0.34	0.9	0.9	0.98	0.96	-0.106295	0.185425	-0.1065
BC100530	100034684	0	0	0	0	0	0	0	0	NA	NA	NA
LOC100034724	100034724	0	0	0	0	40.4	43.86	42.69	50.72	-0.072298	0.0989474	-0.148729
LOC100034726	100034726	0.09	0.2	0.09	0.29	49.85	55.92	51.95	63.55	-0.195028	0.240003	-0.127751
LOC100034727	100034727	0	0	0	0	116.81	152.18	171.63	180.01	-0.199359	0.263256	-0.386547
LOC100034728	100034728	0	0	0	0.21	108.21	122.94	156.55	166.01	-0.509124	0.439899	-0.481677
LOC100034729	100034729	0	0	0	0	0	0	0	0	NA	NA	NA
LOC100036518	100036518	0	0	0	0	0	0	0	0	NA	NA	NA
LOC100036521	100036521	1.48	1.46	2.24	1.5	1.68	1.65	2.13	1.65	-0.244822	0.280766	-0.262267
LOC100037258	100037258	4.64	3.66	3.25	3.17	4.9	4.11	3.02	3.26	0.438386	0.214012	0.446777
LOC100037278	100037278	1.8	1.5	1.61	1.58	1.71	1.71	1.62	1.77	0.0285559	0.110782	0.0303736
LOC100037282	100037282	0.2	0.39	0.27	0.22	9.1	10.04	8.09	9.52	0.159866	0.51709	0.124401
LOC100037283	100037283	0.16	0.26	0.18	0.11	18.52	19.39	18.91	16.29	0.323086	0.636529	0.111061
LOC100038380	100038380	0	0	0	0	0	0	0	0	NA	NA	NA
LOC100038429	100038429	0.79	0.55	2.15	2.69	0.65	0.95	2.3	2.69	-1.76481	0.387842	-1.74138
LOC100038486	100038486	0	0	0	0	0	0	0	0	NA	NA	NA
LOC100038493	100038493	0	0	0	0	0	0	0	0	NA	NA	NA
LOC100038514	100038514	0	0	0	0	0	0	0	0	NA	NA	NA
LOC100038570	100038570	0.06	0	0.06	0	0	0	0.06	0.12	-0.0657586	0.131517	0
LOC100038598	100038598	0	0.1	0	0	0	0	0.09	0	0	0	0
LOC100038600	100038600	0	0	0	0	0	0	0	0	NA	NA	NA
LOC100038618	100038618	0.03	0.07	0	0.03	0.03	0.13	0.03	0.06	0.0946279	0.189256	0
LOC100038635	100038635	0.01	0	0.01	0.02	0.05	0.02	0.01	0.03	0	0	0
LOC100038680	100038680	0	0	0	0	0	0.02	0.01	0	0	0	0
LOC100038683	100038683	0	0.04	0	0	0	0.04	0	0	NA	NA	NA
LOC100038703	100038703	0.21	0.29	0.31	0.23	0.26	0.23	0.31	0.29	-0.203909	0.381863	-0.203533
LOC100038822	100038822	28.27	28.48	51.23	49.94	28.03	28.68	51.67	50.41	-0.840996	0.0350365	-0.841072
LOC100038824	100038824	0	0	0	0	0	0	0	0	NA	NA	NA
LOC100038830	100038830	0	0	0	0	1.74	1.72	0.41	0.32	1.12791	1.30982	2.2448
LOC100038833	100038833	0.15	0.13	0.17	0.03	2.28	2.16	1.94	2.12	0.114471	0.243905	0.147933
LOC100038842	100038842	0.21	0.31	0.37	0.27	0.25	0.27	0.29	0.22	-0.134124	0.506169	-0.14505
LOC100038846	100038846	0	0	0	0	0	0	0	0	NA	NA	NA
LOC100038847	100038847	0	0	0	0	0	0	0	0	NA	NA	NA
LOC100038850	100038850	0	0	0	0	0	0	0	0	NA	NA	NA
LOC100038852	100038852	108.86	135.94	131.04	146.02	402.25	424.96	563.74	595.84	-0.336316	0.18677	-0.42238
LOC100038854	100038854	0	0	0	0	0	0	0	0	NA	NA	NA
LOC100038857	100038857	0	0	0	0	0	0	0.03	0.03	NA	NA	NA
LOC100038858	100038858	0.1	0.16	0.15	0.17	4.07	4.82	4.65	4.21	-0.167354	0.32293	-0.00472241
LOC100038859	100038859	0	0	0	0	0	0	0	0	NA	NA	NA
LOC100038860	100038860	0	0	0	0	0.05	0	0	0	NA	NA	NA
LOC100038862	100038862	0	0	0	0	0	0	0.02	0.02	NA	NA	NA
LOC100038868	100038868	0.66	0.41	0.65	0.3	1.89	0.98	2.02	1.55	-0.071174	0.458257	-0.198127
LOC100038875	100038875	0	0	0	0	207.48	207.52	298.6	289.61	-0.251526	0.291001	-0.50322
LOC100038882	100038882	0	0	0	0	0	0	0	0	NA	NA	NA
LOC100038887	100038887	36.55	34.54	54.85	63.54	36.14	35.54	55.9	64.18	-0.736737	0.150758	-0.740115
LOC100038888	100038888	0	0	0	0	0	0	0	0	NA	NA	NA
LOC100038890	100038890	7.93	7.88	5.78	5.97	7.93	7.81	5.64	5.54	0.460945	0.0440109	0.460404
LOC100038891	100038891	0	0	0	0	0	0	0	0	NA	NA	NA
LOC100038893	100038893	0	0	0	0	0	0	0	0	NA	NA	NA
LOC100038894	100038894	0	0	0	0	0	0	0	0	NA	NA	NA
LOC100038895	100038895	0	0	0	0	0	0	0	0	NA	NA	NA
LOC100038897	100038897	0	0	0	0	0	0	0	0	NA	NA	NA
LOC100038898	100038898	0	0	0	0	0	0	0	0	NA	NA	NA
LOC100038902	100038902	0.04	0	0	0	0	0	0	0	NA	NA	NA
LOC100038903	100038903	0.04	0	0	0	0	0	0	0	NA	NA	NA
LOC100038908	100038908	0.08	0.06	0	0	1.7	1.67	0.96	1.07	0.366666	0.429874	0.789991
LOC100038909	100038909	0.02	0.05	0	0	1.79	1.67	1.02	1.08	0.360052	0.42238	0.749279
LOC100038912	100038912	0	0	0	0	0	0	0	0	NA	NA	NA
LOC100038914	100038914	0	0	0	0	0	0	0	0	NA	NA	NA
LOC100038926	100038926	0	0	0	0	0	0	0	0	NA	NA	NA
LOC100038927	100038927	0	0	0	0	0	0	0	0	NA	NA	NA
LOC100038935	100038935	0	0	0	0	0	0	0	0	NA	NA	NA
LOC100038937	100038937	0	0	0	0	0	0	0	0	NA	NA	NA
LOC100038939	100038939	0	0	0	0	0	0	0	0	NA	NA	NA
LOC100038940	100038940	0	0	0	0	0	0	0	0	NA	NA	NA
LOC100038941	100038941	0	0	0	0	0	0	0	0	NA	NA	NA
LOC100038942	100038942	0	0	0	0	0	0	0	0	NA	NA	NA
LOC100038944	100038944	0	0	0	0	0	0	0	0	NA	NA	NA
LOC100038945	100038945	2.19	2.29	2.29	1.93	2.31	2.84	2.24	1.69	0.243898	0.360491	0.240736
LOC100038946	100038946	0	0	0	0	0	0	0	0	NA	NA	NA
LOC100038947	100038947	0	0	0	0	0	0	0	0	NA	NA	NA
LOC100038948	100038948	0	0	0	0	0	0	0	0	NA	NA	NA
LOC100038949	100038949	0	0	0	0	0	0	0	0.01	NA	NA	NA
LOC100038952	100038952	0	0	0	0	0	0	0	0	NA	NA	NA
LOC100038953	100038953	0	0	0	0	0.01	0.03	0.02	0.04	0	0	0
LOC100038954	100038954	0	0	0	0	0	0	0	0	NA	NA	NA
LOC100038955	100038955	0	0	0	0	0	0	0.01	0	NA	NA	NA
LOC100038956	100038956	0	0	0	0	0	0	0	0	NA	NA	NA
LOC100038957	100038957	0	0	0	0	0	0	0	0	NA	NA	NA
LOC100038958	100038958	0	0	0	0	0	0	0	0	NA	NA	NA
LOC100038959	100038959	0.11	0.23	0	0	0.21	0.12	0.21	0	0.400543	0.544757	0.744161
LOC100038960	100038960	0	0	0	0	0	0	0	0	NA	NA	NA
LOC100038961	100038961	0.43	0.43	0.32	0.55	2.42	2.7	3.5	4.49	-0.298734	0.507484	-0.567161
LOC100038962	100038962	0	0	0	0	0	0	0	0	NA	NA	NA
LOC100038963	100038963	0	0	0	0	0	0	0	0	NA	NA	NA
LOC100038964	100038964	0	0	0	0	0.3	0.27	0.36	0.33	-0.138135	0.159871	-0.275634
LOC100038965	100038965	0	0	0	0	0	0	0	0	NA	NA	NA
LOC100038967	100038967	0	0	0	0	0	0	0	0	NA	NA	NA
LOC100038968	100038968	0	0	0	0	0	0	0	0	NA	NA	NA
LOC100038969	100038969	0	0	0	0	0.35	0.15	0.69	0.46	-0.648978	0.793274	-1.20163
LOC100038971	100038971	0	0	0	0	0	0	0	0	NA	NA	NA
LOC100038972	100038972	0	0	0	0	0.61	0.67	0.2	0	1.08824	1.33935	1.67807
LOC100038973	100038973	4.08	3.97	5.59	5.59	61.99	54.06	84.63	78.96	-0.485921	0.0450641	-0.493954
LOC100038974	100038974	0.01	0.01	0.01	0	0.02	0.02	0.01	0.01	0	0	0
LOC100038975	100038975	0	0	0	0	0	0	0	0	NA	NA	NA
LOC100038976	100038976	0	0	0	0	0	0	0	0	NA	NA	NA
LOC100038977	100038977	0	0	0	0	0	0	0	0	NA	NA	NA
LOC100038978	100038978	0	0	0	0	0.37	0.17	0.75	0.49	-0.636653	0.763824	-1.19931
LOC100038979	100038979	0	0	0	0	0	0	0	0	NA	NA	NA
LOC100038980	100038980	0	0	0	0	0	0	0	0	NA	NA	NA
LOC100038981	100038981	0	0	0	0	0	0	0	0	NA	NA	NA
LOC100038982	100038982	0.07	0.04	0.06	0.04	0.42	0.54	0.47	0.54	-0.0405679	0.0811357	-0.0529489
LOC100038983	100038983	0	0	0	0	0	0	0	0	NA	NA	NA
LOC100038984	100038984	0	0	0	0	0	0	0	0	NA	NA	NA
LOC100038985	100038985	0	0	0	0	0	0	0.04	0.04	NA	NA	NA
LOC100038986	100038986	0	0	0	0	0	0	0	0	NA	NA	NA
LOC100038987	100038987	0	0	0	0	0	0	0	0	NA	NA	NA
LOC100038989	100038989	0	0	0	0	0	0	0	0	NA	NA	NA
LOC100038990	100038990	0	0	0	0	0	0	0	0	NA	NA	NA
LOC100038991	100038991	1.38	2.02	1.73	2.42	389.67	469.66	529.01	550.49	-0.314224	0.0937019	-0.328918
LOC100038992	100038992	0	0	0	0	1.3	1.44	1.94	2	-0.262869	0.306468	-0.52402
LOC100038993	100038993	0	0	0	0	0.23	0.23	0.16	0.1	0.431299	0.569785	0.201634
LOC100038995	100038995	0	0	0	0	0	0	0	0	NA	NA	NA
LOC100038996	100038996	0	0.1	0.35	0.39	1.41	1.07	1.23	1.94	-1.10806	0.997719	-0.599798
LOC100038997	100038997	0	0	0	0	0	0	0	0	NA	NA	NA
LOC100038999	100038999	0.42	0.4	0.83	1.06	8.7	8.13	12.53	12.79	-0.892176	0.392831	-0.624469
LOC100039000	100039000	0	0	0	0	0.06	0.07	0.12	0.16	-0.235277	0.320181	0
LOC100039001	100039001	0.02	0	0	0	0.02	0	0	0	NA	NA	NA
LOC100039002	100039002	0	0	0	0	0	0	0	0	NA	NA	NA
LOC100039003	100039003	0	0	0	0	0	0	0	0	NA	NA	NA
LOC100039004	100039004	0	0	0	0	0	0	0	0	NA	NA	NA
LOC100039005	100039005	0	0	0	0	0	0	0	0	NA	NA	NA
LOC100039006	100039006	0.02	0.02	0.06	0.03	0.09	0.05	0.15	0.11	-0.180617	0.277248	0
LOC100039007	100039007	0	0	0	0.16	0	0	0	0.16	NA	NA	NA
LOC100039008	100039008	0	0	0	0	0	0	0	0	NA	NA	NA
LOC100039010	100039010	0	0	0	0	0	0	0	0	NA	NA	NA
LOC100039011	100039011	0	0	0	0	0	0	0	0	NA	NA	NA
LOC100039012	100039012	0	0	0	0	0	0	0	0	NA	NA	NA
LOC100039014	100039014	0	0	0	0	0	0	0	0	NA	NA	NA
LOC100039015	100039015	0	0	0	0	0	0	0	0	NA	NA	NA
LOC100039016	100039016	0	0	0	0	0	0	0	0	NA	NA	NA
LOC100039017	100039017	0	0	0	0	0.08	0.04	0.04	0.04	0	0	0
LOC100039018	100039018	0	0	0	0.17	0	0	0	0.17	NA	NA	NA
LOC100039019	100039019	0	0	0	0	0	0	0	0	NA	NA	NA
LOC100039020	100039020	0	0	0	0	0	0	0	0	NA	NA	NA
LOC100039021	100039021	0	0	0	0	0	0	0	0	NA	NA	NA
LOC100039023	100039023	0	0	0.02	0	0	0.02	0.02	0.02	0	0	0
LOC100039024	100039024	0	0	0	0	0	0	0	0	NA	NA	NA
LOC100039025	100039025	0	0	0	0	0	0	0	0	NA	NA	NA
LOC100039026	100039026	1.65	1.33	1.66	1.33	13.66	12.68	13.71	12.81	-0.00717601	0.00617378	-0.00931882
LOC100039027	100039027	0.06	0	0	0	0.9	0.99	1.13	0.86	-0.0313085	0.219942	-0.0292943
LOC100039028	100039028	0	0	0	0	0	0	0	0	NA	NA	NA
LOC100039029	100039029	0	0	0	0	0	0	0	0	NA	NA	NA
LOC100039030	100039030	0	0	0	0	0	0	0	0	NA	NA	NA
LOC100039031	100039031	0	0	0	0	0	0	0	0	NA	NA	NA
LOC100039032	100039032	0	0	0	0	0	0	0	0	NA	NA	NA
LOC100039034	100039034	0	0	0	0	0	0	0	0	NA	NA	NA
LOC100039035	100039035	0	0	0	0	0	0	0	0	NA	NA	NA
LOC100039036	100039036	0	0	0	0	32.27	39.79	42.74	45.01	-0.145808	0.192294	-0.2842
LOC100039037	100039037	0	0	0	0	0	0	0	0	NA	NA	NA
LOC100039038	100039038	0	0	0	0	0	0	0	0	NA	NA	NA
LOC100039039	100039039	0	0	0	0	0	0.02	0	0.02	0	0	0
LOC100039040	100039040	0	0	0	0	0	0	0	0	NA	NA	NA
LOC100039041	100039041	0	0	0	0	0	0	0	0	NA	NA	NA
LOC100039042	100039042	0	0	0	0	0.08	0.06	0.08	0.06	0	0	0
LOC100039043	100039043	0	0	0	0.03	0.03	0	0	0.06	0	0	0
LOC100039044	100039044	0.02	0	0	0	0.05	0	0.02	0.02	0	0	0
LOC100039045	100039045	0	0	0	0	0.02	0.01	0.01	0.01	0	0	0
LOC100039046	100039046	0	0.02	0.01	0	0	0	0.02	0	0	0	0
LOC100039047	100039047	0	0	0	0	0	0	0	0	NA	NA	NA
LOC100039048	100039048	0	0	0	0	0	0	0	0	NA	NA	NA
LOC100039049	100039049	0	0	0	0	0	0	0	0	NA	NA	NA
LOC100039050	100039050	0	0	0.01	0.01	0.02	0.01	0.02	0.02	0	0	0
LOC100039051	100039051	0	0	0	0	0	0	0	0	NA	NA	NA
LOC100039052	100039052	0	0	0	0	0.03	0.03	0.06	0.03	0	0	0
LOC100039053	100039053	0	0	0	0	0	0	0	0	NA	NA	NA
LOC100039054	100039054	0	0	0	0	0	0	0	0	NA	NA	NA
LOC100039055	100039055	0	0	0	0	0.01	0	0	0.01	0	0	0
LOC100039056	100039056	0	0	0	0	0	0	0	0	NA	NA	NA
LOC100039057	100039057	0	0	0	0	0	0	0	0	NA	NA	NA
LOC100039058	100039058	0	0	0	0	0	0	0	0	NA	NA	NA
LOC100039059	100039059	0	0	0	0	0	0	0	0	NA	NA	NA
LOC100039060	100039060	0	0	0	0	0.08	0.04	0.04	0.04	0	0	0
LOC100039061	100039061	0	0	0	0	0	0	0	0	NA	NA	NA
LOC100039062	100039062	0.24	0.18	0.56	0.36	1.41	1.36	2.4	2.14	-0.910934	0.2527	-0.775345
LOC100039063	100039063	0	0	0	0	0	0	0	0	NA	NA	NA
LOC100039064	100039064	0	0	0	0	0.16	0.18	0	0.18	0.169518	0.339036	0
LOC100039065	100039065	0	0	0	0	0	0	0	0	NA	NA	NA
LOC100039066	100039066	0	0	0	0	0	0	0	0.02	NA	NA	NA
LOC100039067	100039067	0	0	0	0	0	0	0	0	NA	NA	NA
LOC100039068	100039068	0	0	0	0	0	0	0	0	NA	NA	NA
LOC100039069	100039069	0	0	0	0	0.01	0.01	0.01	0.01	0	0	0
LOC100039070	100039070	0	0.02	0	0	0	0.02	0	0.05	0	0	0
LOC100039072	100039072	0	0	0	0	0	0	0	0	NA	NA	NA
LOC100039073	100039073	0	0	0	0	0	0	0	0	NA	NA	NA
LOC100039074	100039074	0	0	0	0	0	0	0	0	NA	NA	NA
LOC100039075	100039075	0	0	0	0	0	0	0	0	NA	NA	NA
LOC100039076	100039076	0	0	0	0	0.06	0	0	0	NA	NA	NA
LOC100039077	100039077	0	0	0	0	0	0	0	0	NA	NA	NA
LOC100039078	100039078	0.1	0.32	0.23	0.18	0.98	0.9	1.36	0.9	-0.211078	0.852101	-0.215206
LOC100039079	100039079	0	0	0	0	0.34	0	0	0.19	0.209884	1.12522	0
LOC100039080	100039080	0	0	0	0	0.02	0.05	0.03	0.03	0	0	0
LOC100039081	100039081	0	0	0	0	0	0	0	0	NA	NA	NA
LOC100039082	100039082	0	0	0	0	0	0	0	0	NA	NA	NA
LOC100039083	100039083	0.99	2.35	1.8	2.88	2.13	3.62	1.63	2.7	-0.0867232	0.613145	0.0127532
LOC100039084	100039084	0	0	0	0	0	0	0	0	NA	NA	NA
LOC100039085	100039085	0	0	0	0	0.01	0.01	0	0.01	0	0	0
LOC100039086	100039086	2.64	2.36	3.31	4.29	4.79	4.64	6.71	6.67	-0.549583	0.225289	-0.539943
LOC100039087	100039087	0	0	0	0	0	0	0	0	NA	NA	NA
LOC100039088	100039088	0	0	0	0	0	0	0	0	NA	NA	NA
LOC100039089	100039089	0	0	0	0	0.05	0	0	0	NA	NA	NA
LOC100039090	100039090	0	0	0	0	0	0	0	0	NA	NA	NA
LOC100039091	100039091	0	0	0	0	0	0	0	0	NA	NA	NA
LOC100039092	100039092	0.93	1.22	0.66	0.87	1.19	1.12	0.53	0.92	0.608312	0.385032	0.581731
LOC100039093	100039093	0	0	0	0	0.08	0.07	0.07	0.09	0	0	0
LOC100039094	100039094	0	0	0	0	0	0	0	0	NA	NA	NA
LOC100039095	100039095	0	0	0	0	0	0	0	0	NA	NA	NA
LOC100039096	100039096	0	0	0	0	0	0.02	0	0	NA	NA	NA
LOC100039097	100039097	0	0	0	0	0	0	0	0	NA	NA	NA
LOC100039098	100039098	0	0	0	0	0	0	0	0	NA	NA	NA
LOC100039099	100039099	0	0	0	0	0	0	0	0	NA	NA	NA
LOC100039100	100039100	0	0	0	0	0	0	0	0	NA	NA	NA
LOC100039101	100039101	0	0	0	0	0	0	0	0	NA	NA	NA
LOC100039102	100039102	0	0	0	0	0	0	0	0	NA	NA	NA
LOC100039103	100039103	0	0	0	0	0	0	0	0	NA	NA	NA
LOC100039104	100039104	0	0	0	0	0.02	0.02	0.02	0.02	0	0	0
LOC100039105	100039105	0	0	0	0	0.01	0	0.01	0	0	0	0
LOC100039106	100039106	0	0	0	0	0.07	0.07	0.01	0.04	0	0	0
LOC100039108	100039108	0	0	0	0	0	0	0	0	NA	NA	NA
LOC100039109	100039109	0	0	0	0	0	0	0	0	NA	NA	NA
LOC100039110	100039110	1.03	1.21	1.37	1.36	1.17	1.52	1.72	1.67	-0.317952	0.200724	-0.311944
LOC100039111	100039111	0	0	0	0	0	0	0	0	NA	NA	NA
LOC100039112	100039112	0	0	0	0	0	0	0	0	NA	NA	NA
LOC100039113	100039113	0	0	0	0	0	0	0	0	NA	NA	NA
LOC100039114	100039114	0	0	0	0	0	0	0	0	NA	NA	NA
LOC100039115	100039115	0	0	0	0	0	0	0	0	NA	NA	NA
LOC100039116	100039116	0	0	0	0	0	0	0	0	NA	NA	NA
LOC100039117	100039117	0.02	0	0	0.02	0.05	0	0.07	0.02	0	0	0
LOC100039118	100039118	0	0	0.02	0	0	0	0	0	NA	NA	NA
LOC100039119	100039119	0	0	0	0	0	0	0	0	NA	NA	NA
LOC100039120	100039120	0	0	0	0	0	0	0	0	NA	NA	NA
LOC100039121	100039121	0.02	0.02	0.02	0.02	0.03	0.03	0.03	0.02	0	0	0
LOC100039122	100039122	0	0	0	0	0	0	0	0	NA	NA	NA
LOC100039123	100039123	0.01	0.02	0.01	0.02	0.11	0.11	0.18	0.19	-0.374747	0.433891	0
LOC100039124	100039124	0	0	0	0.01	0.03	0.03	0.03	0.05	0	0	0
LOC100039125	100039125	0	0	0	0	0	0	0	0	NA	NA	NA
LOC100039126	100039126	0	0	0	0	0	0	0	0	NA	NA	NA
LOC100039127	100039127	0	0	0	0	0	0	0	0	NA	NA	NA
LOC100039128	100039128	0	0	0	0	0	0	0	0	NA	NA	NA
LOC100039129	100039129	0	0	0	0	0.04	0.04	0	0	NA	NA	NA
LOC100039130	100039130	0	0	0	0	0	0	0	0	NA	NA	NA
LOC100039131	100039131	0	0	0	0	0	0	0	0	NA	NA	NA
LOC100039133	100039133	0.09	0.08	0.09	0.11	3.75	4.3	3.51	3.82	0.03217	0.132957	0.126489
LOC100039134	100039134	0.48	0.53	0.87	0.6	0.49	0.46	1.2	0.92	-0.832283	0.471562	-0.87313
LOC100039135	100039135	0	0	0	0	0	0	0	0	NA	NA	NA
LOC100039136	100039136	0	0	0	0	0	0	0	0	NA	NA	NA
LOC100039137	100039137	0	0	0	0.02	0.19	0.21	0.19	0.16	0.0980794	0.196159	0
LOC100039138	100039138	0	0	0.13	0.13	0	0	0	0.28	NA	NA	NA
LOC100039139	100039139	0	0	0	0	0	0	0	0	NA	NA	NA
LOC100039140	100039140	0	0	0	0	0	0	0.02	0	NA	NA	NA
LOC100039141	100039141	0	0	0	0	0	0	0	0	NA	NA	NA
LOC100039142	100039142	0.08	0.02	0.08	0.07	0.16	0.2	0.16	0.14	0.128643	0.257287	0.0317089
LOC100039143	100039143	0	0	0	0	0	0	0	0	NA	NA	NA
LOC100039144	100039144	0	0	0	0	0	0	0	0	NA	NA	NA
LOC100039145	100039145	0	0	0	0	0	0	0	0	NA	NA	NA
LOC100039146	100039146	0	0	0	0	0.01	0	0	0.02	0	0	0
LOC100039147	100039147	0	0	0	0	0	0	0	0	NA	NA	NA
LOC100039148	100039148	0	0	0	0	0	0	0	0	NA	NA	NA
LOC100039149	100039149	0.18	0.4	0.27	0.25	0.09	0.3	0.18	0.3	-0.188722	0.677888	-0.0439433
LOC100039150	100039150	0	0	0	0	0	0	0	0	NA	NA	NA
LOC100039151	100039151	0	0	0	0	0	0	0	0	NA	NA	NA
LOC100039152	100039152	0	0	0	0	0	0	0	0	NA	NA	NA
LOC100039153	100039153	0	0	0	0	0	0	0	0	NA	NA	NA
LOC100039154	100039154	0	0	0	0	0.26	0.41	0.35	0.31	-0.0063719	0.339823	0.0216951
LOC100039155	100039155	0	0	0	0	0	0	0	0	NA	NA	NA
LOC100039156	100039156	0	0	0	0	0.26	0.17	0.31	0.29	-0.256069	0.363229	-0.480626
LOC100039157	100039157	0	0	0	0	0	0	0	0	NA	NA	NA
LOC100039158	100039158	0	0	0	0	0.64	0.61	0.24	0.27	0.647722	0.754272	1.29336
LOC100039159	100039159	0	0	0	0	0.12	0	0	0	NA	NA	NA
LOC100039160	100039160	0	0	0	0	0	0	0	0	NA	NA	NA
LOC100039161	100039161	0	0	0	0	0	0	0	0	NA	NA	NA
LOC100039162	100039162	0	0	0	0	0	0	0	0	NA	NA	NA
LOC100039163	100039163	0.42	0.26	0.18	0.21	2.34	2.06	2.09	2.01	0.432242	0.538416	0.178113
LOC100039164	100039164	0	0	0	0	0	0	0	0	NA	NA	NA
LOC100039165	100039165	0	0	0	0	0	0	0	0	NA	NA	NA
LOC100039166	100039166	0	0	0	0	0	0	0	0	NA	NA	NA
LOC100039167	100039167	0.12	0	0	0	1.23	0.95	1.47	1.35	-0.125271	0.331439	-0.294061
LOC100039168	100039168	0	0	0	0	0	0	0	0	NA	NA	NA
LOC100039169	100039169	0	0	0	0	0	0.01	0	0.01	0	0	0
LOC100039170	100039170	0	0	0	0	0	0	0	0	NA	NA	NA
LOC100039171	100039171	0	0	0	0	0	0	0	0	NA	NA	NA
LOC100039172	100039172	0	0	0	0	0	0	0	0	NA	NA	NA
LOC100039173	100039173	0	0	0	0	0	0	0	0	NA	NA	NA
LOC100039174	100039174	0	0	0	0	14.89	15.15	21.93	20.72	-0.252567	0.294884	-0.505661
LOC100039175	100039175	0	0	0	0	0.03	0	0	0	NA	NA	NA
LOC100039176	100039176	0	0	0	0	0	0	0	0	NA	NA	NA
LOC100039177	100039177	0	0	0	0	0	0	0	0	NA	NA	NA
LOC100039178	100039178	0	0	0	0	0	0	0	0	NA	NA	NA
LOC100039179	100039179	0	0	0	0	0	0	0	0	NA	NA	NA
LOC100039181	100039181	0	0	0	0	0	0	0	0	NA	NA	NA
LOC100039182	100039182	0.06	0	0	0	0.4	0.5	0.17	0.19	0.657598	0.762185	1.26303
LOC100039183	100039183	0	0	0	0	0	0	0	0	NA	NA	NA
LOC100039184	100039184	0	0	0	0	0	0	0	0	NA	NA	NA
LOC100039185	100039185	0	0	0	0	0	0	0.33	0	NA	NA	NA
LOC100039186	100039186	0	0	0	0	0	0	0	0	NA	NA	NA
LOC100039187	100039187	0	0	0	0	0	0	0	0	NA	NA	NA
LOC100039188	100039188	0	0	0	0	0	0	0	0	NA	NA	NA
LOC100039190	100039190	0	0	0	0	0.11	0	0	0	NA	NA	NA
LOC100039191	100039191	0	0	0	0	0	0	0	0	NA	NA	NA
LOC100039192	100039192	0	0	0	0	11.6	10.19	7.83	7.43	0.25569	0.298723	0.513911
LOC100039193	100039193	0	0	0	0	0	0	0	0	NA	NA	NA
LOC100039194	100039194	0	0	0	0	0	0	0	0	NA	NA	NA
LOC100039195	100039195	0	0	0	0	0	0	0	0	NA	NA	NA
LOC100039196	100039196	0	0	0	0	0.07	0	0	0	NA	NA	NA
LOC100039197	100039197	0	0	0	0	0	0	0.01	0	NA	NA	NA
LOC100039198	100039198	0	0	0	0	0.04	0.03	0.03	0.03	0	0	0
LOC100039199	100039199	0	0	0	0	0	0	0	0	NA	NA	NA
LOC100039200	100039200	0	0	0	0.1	0	0	0.17	0	NA	NA	NA
LOC100039201	100039201	0	0	0	0	0.06	0	0.12	0.06	-0.0657586	0.131517	0
LOC100039202	100039202	0	0	0	0	0.01	0.01	0.02	0.02	0	0	0
LOC100039203	100039203	0	0	0	0.06	0.3	0.27	0.42	0.46	-0.313525	0.380047	-0.721699
LOC100039204	100039204	0	0	0	0	0	0.02	0	0.02	0	0	0
LOC100039205	100039205	0	0	0	0	0	0	0	0	NA	NA	NA
LOC100039206	100039206	0	0	0	0	0	0	0	0	NA	NA	NA
LOC100039208	100039208	0	0	0	0	0	0	0	0	NA	NA	NA
LOC100039209	100039209	0	0	0	0	0	0	0	0	NA	NA	NA
LOC100039210	100039210	0	0	0	0	0	0	0	0	NA	NA	NA
LOC100039211	100039211	0	0	0	0	0	0	0	0	NA	NA	NA
LOC100039212	100039212	0	0	0	0	0	0	0	0	NA	NA	NA
LOC100039213	100039213	0	0	0	0	0	0	0	0	NA	NA	NA
LOC100039214	100039214	0.86	0.61	0.75	0.53	4.04	2.73	3.53	2.85	0.133222	0.130233	0.1053
LOC100039215	100039215	0	0	0	0	0	0	0	0	NA	NA	NA
LOC100039217	100039217	0.01	0.01	0.02	0	0.13	0.13	0.15	0.1	0.0430152	0.243921	0
LOC100039218	100039218	0.03	0	0	0	0.4	0.37	0.43	0.3	0.0495565	0.175696	0.132104
LOC100039219	100039219	0	0	0	0	0.07	0.08	0	0	NA	NA	NA
LOC100039220	100039220	1.7	0.91	2.15	0.96	13.77	9.44	13.14	9.7	-0.0969011	0.172514	-0.00724554
LOC100039221	100039221	0	0	0	0	0.01	0.01	0	0.01	0	0	0
LOC100039222	100039222	0	0	0	0	0	0	0	0	NA	NA	NA
LOC100039223	100039223	0	0	0	0	0	0	0	0	NA	NA	NA
LOC100039224	100039224	0	0	0	0	0	0	0	0	NA	NA	NA
LOC100039225	100039225	0.11	0	0	0.06	0	0	0	0.18	-0.177623	0.451592	0
LOC100039226	100039226	0	0	0	0	0.38	0.17	0.23	0.25	0.0419931	0.525111	0.196397
LOC100039227	100039227	0	0	0	0	0	0	0	0	NA	NA	NA
LOC100039228	100039228	0	0	0	0	0.1	0	0	0	NA	NA	NA
LOC100039229	100039229	0.12	0.16	0	0.05	0.19	0.32	0.27	0.33	0.0974381	0.49999	0.281413
LOC100039231	100039231	0	0	0	0	0	0	0	0	NA	NA	NA
LOC100039232	100039232	4.53	5.49	6.33	7.1	4.53	5.48	6.64	7.11	-0.445263	0.0877112	-0.440383
LOC100039233	100039233	0	0	0	0	0	0	0	0	NA	NA	NA
LOC100039234	100039234	0	0	0	0	0	0	0	0	NA	NA	NA
LOC100039235	100039235	0.32	0.16	0.37	0.33	0.34	0.18	0.44	0.33	-0.625071	0.39784	-0.555816
LOC100039236	100039236	0	0	0	0	0	0	0	0	NA	NA	NA
LOC100039237	100039237	0	0	0	0	0	0	0	0	NA	NA	NA
LOC100039238	100039238	0.65	0	0	0	0.13	0	0.13	0	0.67511	1.35022	0.963474
LOC100039239	100039239	0	0	0	0	0	0	0	0	NA	NA	NA
LOC100039240	100039240	0	0	0	0	0	0	0	0	NA	NA	NA
LOC100039241	100039241	0	0	0	0	0	0	0	0	NA	NA	NA
LOC100039242	100039242	0	0	0	0	0	0	0	0	NA	NA	NA
LOC100039243	100039243	0.38	0.53	0.91	0.74	1.79	1.77	2.96	2.84	-0.787295	0.332503	-0.736966
LOC100039244	100039244	0	0	0	0	0	0	0	0	NA	NA	NA
LOC100039245	100039245	0	0	0	0	0	0	0	0	NA	NA	NA
LOC100039246	100039246	0	0	0	0	0.03	0	0	0	NA	NA	NA
LOC100039247	100039247	0	0	0	0	0	0	0	0	NA	NA	NA
LOC100039248	100039248	0	0	0	0	0	0	0	0	NA	NA	NA
LOC100039249	100039249	0	0	0	0	0	0	0	0	NA	NA	NA
LOC100039250	100039250	0	0	0	0	0	0	0	0	NA	NA	NA
LOC100039252	100039252	1.39	0.54	0.9	0.76	11.2	6.13	9.41	7.8	0.00942325	0.522783	0.0295133
LOC100039253	100039253	0	0.01	0	0	0.01	0.02	0.01	0.01	0	0	0
LOC100039254	100039254	0	0	0	0	0.02	0	0	0	NA	NA	NA
LOC100039255	100039255	0	0	0	0	0	0	0	0	NA	NA	NA
LOC100039256	100039256	0.02	0	0.04	0.02	2.18	1.85	2.09	2.17	-0.0423361	0.128463	-0.0931094
LOC100039257	100039257	0	0	0	0	11.92	10.48	8.05	7.63	0.256052	0.298959	0.514573
LOC100039258	100039258	0.61	0.41	0.36	0.18	3.31	2.49	2.02	2.26	0.700185	0.430284	0.500739
LOC100039259	100039259	0	0	0	0	0	0	0	0	NA	NA	NA
LOC100039260	100039260	0	0	0	0	0	0	0	0	NA	NA	NA
LOC100039261	100039261	0	0	0	0	0	0	0	0	NA	NA	NA
LOC100039262	100039262	0	0	0	0	0.01	0.01	0.01	0.01	0	0	0
LOC100039263	100039263	0	0	0	0	0	0.02	0	0	NA	NA	NA
LOC100039264	100039264	0.34	0.22	0.19	0.29	0.58	0.43	0.46	0.52	0.125308	0.573835	0.104796
LOC100039265	100039265	0	0	0	0	0	0	0	0	NA	NA	NA
LOC100039266	100039266	0	0	0	0	0.46	0.38	0.35	0.64	-0.0894484	0.479258	-0.237039
LOC100039267	100039267	0	0	0	0	0	0	0	0	NA	NA	NA
LOC100039268	100039268	0	0	0	0	0	0	0	0	NA	NA	NA
LOC100039269	100039269	0	0	0	0	0	0	0	0	NA	NA	NA
LOC100039271	100039271	0	0	0	0	0	0	0	0	NA	NA	NA
LOC100039272	100039272	0	0	0	0	0.04	0	0	0	NA	NA	NA
LOC100039273	100039273	0	0	0.01	0	0.02	0.01	0	0.03	0	0	0
LOC100039274	100039274	0	0	0	0.1	0	0	0	0	NA	NA	NA
LOC100039275	100039275	0	0	0	0	0.02	0.02	0.02	0.02	0	0	0
LOC100039276	100039276	0	0	0	0	0	0	0	0	NA	NA	NA
LOC100039277	100039277	0	0	0	0	0	0	0	0	NA	NA	NA
LOC100039278	100039278	0	0	0	0	0.17	0.09	0	0.09	0.191384	0.382767	0
LOC100039279	100039279	0	0	0	0	0	0	0	0	NA	NA	NA
LOC100039280	100039280	0	0	0	0	0	0	0	0	NA	NA	NA
LOC100039281	100039281	5.9	5.43	11.04	10.16	28.38	28.03	49.62	50.65	-0.866867	0.0469766	-0.84252
LOC100039282	100039282	0	0	0	0	0	0	0	0	NA	NA	NA
LOC100039284	100039284	0	0	0	0	0	0	0	0	NA	NA	NA
LOC100039285	100039285	0	0	0	0	0	0.01	0	0.02	0	0	0
LOC100039286	100039286	0	0	0	0	0	0	0	0	NA	NA	NA
LOC100039287	100039287	0.45	0.25	0.54	0.25	0.81	0.85	0.9	0.64	-0.00141164	0.294327	0.0184569
LOC100039288	100039288	0	0	0	0	0	0	0.08	0	NA	NA	NA
LOC100039289	100039289	0	0	0	0.03	0.11	0.03	0.17	0.25	-0.48749	0.630167	-0.169925
LOC100039290	100039290	0	0	0	0	0.08	0.09	0	0	NA	NA	NA
LOC100039291	100039291	0	0	0	0	0	0	0	0	NA	NA	NA
LOC100039292	100039292	0	0	0	0	0.41	0.29	0.41	0.29	0	0	0
LOC100039293	100039293	0	0	0	0	0	0	0	0	NA	NA	NA
LOC100039294	100039294	0	0	0	0	0	0	0	0	NA	NA	NA
LOC100039295	100039295	0	0	0	0	0	0	0	0.06	NA	NA	NA
LOC100039296	100039296	0	0	0	0	0.01	0	0.01	0	0	0	0
LOC100039297	100039297	0.02	0.02	0	0	0.03	0.02	0.02	0.03	0	0	0
LOC100039298	100039298	0	0	0	0	0	0	0	0	NA	NA	NA
LOC100039299	100039299	0	0	0	0	0	0	0	0	NA	NA	NA
LOC100039300	100039300	0.76	1.37	1.43	2.74	3.55	3.91	5.15	6.64	-0.803178	0.202554	-0.734858
LOC100039301	100039301	0	0	0	0	0	0	0	0	NA	NA	NA
LOC100039302	100039302	0.17	0.37	0.25	0.18	1.1	1.22	1.27	1.03	0.130012	0.689255	0.0671142
LOC100039303	100039303	0.56	0.12	0.33	1.36	1.01	0.99	2.35	2.97	-1.3857	1.74789	-1.38718
LOC100039304	100039304	0	0	0	0	0	0	0	0	NA	NA	NA
LOC100039305	100039305	0	0	0	0	0	0	0	0	NA	NA	NA
LOC100039307	100039307	0	0	0	0	0	0	0	0	NA	NA	NA
LOC100039308	100039308	0	0	0	0	0	0	0	0	NA	NA	NA
LOC100039309	100039309	0	0	0	0	0	0	0	0	NA	NA	NA
LOC100039310	100039310	0	0	0	0	0	0	0	0	NA	NA	NA
LOC100039311	100039311	0	0	0	0	0.04	0	0	0	NA	NA	NA
LOC100039312	100039312	0	0	0	0	0	0.07	0	0	NA	NA	NA
LOC100039313	100039313	0	0	0	0	0.01	0.01	0.01	0.02	0	0	0
LOC100039314	100039314	0	0	0	0	0	0	0	0	NA	NA	NA
LOC100039315	100039315	0	0	0	0	0	0	0	0	NA	NA	NA
LOC100039316	100039316	248.23	252.95	329.06	338.84	1252.57	1302.61	1537.68	1566.36	-0.347575	0.0781485	-0.303492
LOC100039317	100039317	0	0	0	0	0	0	0	0	NA	NA	NA
LOC100039318	100039318	0	0	0	0	0	0	0	0	NA	NA	NA
LOC100039319	100039319	0	0	0	0	0	0	0	0	NA	NA	NA
LOC100039320	100039320	0	0	0	0	0	0	0	0	NA	NA	NA
LOC100039321	100039321	0	0	0	0	0	0	0	0	NA	NA	NA
LOC100039322	100039322	0	0	0	0	1.68	0.85	1.67	1.85	-0.278344	0.562445	-0.476438
LOC100039323	100039323	0	0	0	0	0	0	0	0	NA	NA	NA
LOC100039324	100039324	0	0	0	0	0	0	0	0	NA	NA	NA
LOC100039325	100039325	0	0	0	0	0	0	0	0	NA	NA	NA
LOC100039326	100039326	0	0	0	0	0.11	0	0.1	0	0.0343759	0.0687518	0
LOC100039327	100039327	0.89	1.43	1.29	1.03	3.89	3.7	3.87	4.47	-0.081859	0.431462	-0.10525
LOC100039328	100039328	0	0	0	0	0	0	0	0	NA	NA	NA
LOC100039329	100039329	0	0	0	0	0	0	0	0	NA	NA	NA
LOC100039330	100039330	0	0	0	0	0	0	0	0	NA	NA	NA
LOC100039331	100039331	0	0	0	0	0	0	0	0	NA	NA	NA
LOC100039332	100039332	0	0	0	0	0	0	0	0	NA	NA	NA
LOC100039334	100039334	0	0	0	0	0	0	0	0	NA	NA	NA
LOC100039335	100039335	0	0	0	0	0	0	0	0	NA	NA	NA
LOC100039336	100039336	0	0	0	0	0	0	0	0	NA	NA	NA
LOC100039337	100039337	0	0.01	0	0	0	0.02	0	0.01	0	0	0
LOC100039338	100039338	0	0	0	0	0	0	0	0	NA	NA	NA
LOC100039339	100039339	0	0	0	0	0	0	0	0	NA	NA	NA
LOC100039340	100039340	0	0	0	0	0	0	0	0	NA	NA	NA
LOC100039341	100039341	0.18	0.39	0	0	0.26	0.2	0.09	0	1.2975	0.496871	1.36457
LOC100039342	100039342	0.01	0.01	0	0	0.06	0.05	0.11	0.09	-0.0343759	0.0687518	0
LOC100039343	100039343	0.11	0.16	0.15	0.21	7.58	5.79	12.29	11.59	-0.634559	0.278132	-0.829546
LOC100039344	100039344	0	0	0	0	0	0	0	0	NA	NA	NA
LOC100039345	100039345	0	0	0	0	0	0	0	0	NA	NA	NA
LOC100039346	100039346	0.05	0.06	0.05	0.06	79.38	74.29	107.38	97.28	-0.206213	0.238883	-0.413136
LOC100039347	100039347	0	0	0	0	0.01	0.01	0.01	0	0	0	0
LOC100039348	100039348	0	0	0	0.01	0	0	0	0	NA	NA	NA
LOC100039349	100039349	0	0	0	0	0	0	0	0	NA	NA	NA
LOC100039350	100039350	0	0	0	0	0.18	0.07	0.31	0.34	-0.637452	0.838017	-0.70044
LOC100039351	100039351	2.57	2.54	2.52	2.7	4.95	5.29	5.18	5.93	-0.0725186	0.0795306	-0.0892861
LOC100039352	100039352	0	0	0	0	0	0	0	0	NA	NA	NA
LOC100039353	100039353	0	0.3	0.14	0.14	1.33	1.76	1.06	1.31	0.34187	0.649556	0.355293
LOC100039354	100039354	0	0	0	0	0.01	0	0	0	NA	NA	NA
LOC100039355	100039355	34.73	33.15	49.65	50.7	828.33	753.97	1097.75	1065.44	-0.508433	0.0846744	-0.455957
LOC100039357	100039357	0	0	0	0	0	0	0	0	NA	NA	NA
LOC100039358	100039358	0	0.02	0.08	0	0.64	0.59	0.61	0.54	0.0492546	0.061684	0.0232698
LOC100039359	100039359	0.07	0.14	0	0.14	0.07	0.07	0	0	0	0	0
LOC100039360	100039360	0	0	0	0	0	0	0	0	NA	NA	NA
LOC100039361	100039361	0	0	0	0	0	0	0.06	0	NA	NA	NA
LOC100039362	100039362	0	0	0	0	0	0	0	0	NA	NA	NA
LOC100039363	100039363	0	0.27	0.62	0.27	0	0.14	0.12	0.41	-1.11137	1.21936	-1.7922
LOC100039364	100039364	0	0	0	0	0	0	0	0	NA	NA	NA
LOC100039365	100039365	0	0	0	0	0	0	0	0	NA	NA	NA
LOC100039366	100039366	0	0	0	0	0	0	0	0	NA	NA	NA
LOC100039367	100039367	0	0	0	0	0	0	0	0	NA	NA	NA
LOC100039368	100039368	0	0	0	0	0	0	0	0	NA	NA	NA
LOC100039369	100039369	0.12	0.27	0	0.68	0	0	0	0.27	-0.625625	0.881795	-1.24793
LOC100039370	100039370	0.42	0.12	0.52	0.46	5.53	3.91	5.6	8.48	-0.845441	0.864448	-0.59361
LOC100039371	100039371	0	0	0	0	0	0	0	0	NA	NA	NA
LOC100039372	100039372	0	0	0	0	0	0	0	0	NA	NA	NA
LOC100039373	100039373	0	0	0	0	0	0	0	0	NA	NA	NA
LOC100039374	100039374	0	0	0	0	0	0	0	0.01	NA	NA	NA
LOC100039375	100039375	0.28	0.23	0.17	0.19	6.74	5.67	9.18	11.44	-0.115721	0.766993	-0.699409
LOC100039376	100039376	0.67	0.48	0.55	0.35	8.11	5.76	3.9	4	0.580676	0.332836	0.771309
LOC100039377	100039377	0	0	0	0	0	0	0	0	NA	NA	NA
LOC100039378	100039378	0	0	0	0	0.51	0.64	1.79	1.56	-0.774198	0.919395	-1.54253
LOC100039379	100039379	0	0	0	0	0	0	0	0	NA	NA	NA
LOC100039380	100039380	0	0	0	0	0	0	0	0	NA	NA	NA
LOC100039381	100039381	0	0	0	0	0.01	0.01	0	0	NA	NA	NA
LOC100039382	100039382	0	0	0	0	0	0	0	0	NA	NA	NA
LOC100039383	100039383	0	0	0	0	0.6	0.25	0.52	0.24	0.0663361	0.0974483	0.161463
LOC100039384	100039384	2.78	2.66	4.09	4.36	5.43	5.14	7.63	8.54	-0.623279	0.118201	-0.620857
LOC100039386	100039386	0	0	0	0	0	0	0	0	NA	NA	NA
LOC100039387	100039387	0	0	0	0.02	0	0	0	0	NA	NA	NA
LOC100039388	100039388	0	0	0	0	0	0	0	0.23	NA	NA	NA
LOC100039389	100039389	0	0	0	0	0	0	0	0.01	NA	NA	NA
LOC100039390	100039390	0	0	0	0	0	0	0	0	NA	NA	NA
LOC100039391	100039391	0	0	0	0	0	0	0	0	NA	NA	NA
LOC100039392	100039392	0.8	1.24	0.96	0.88	1.77	2.48	2.24	3.36	-0.136535	0.426924	-0.242243
LOC100039393	100039393	0	0	0	0	0	0	0	0	NA	NA	NA
LOC100039394	100039394	0	0	0	0	0.02	0.04	0.01	0.02	0	0	0
LOC100039395	100039395	0	0	0	0	0	0	0	0	NA	NA	NA
LOC100039396	100039396	0	0	0	0	4.88	5.03	2.9	2.61	0.424334	0.496449	0.846833
LOC100039397	100039397	0	0	0	0	0.1	0.22	0.3	0.33	-0.542481	0.747695	-0.655352
LOC100039398	100039398	0	0	0	0	0.01	0.01	0.01	0.01	0	0	0
LOC100039399	100039399	0	0	0	0	0	0	0	0	NA	NA	NA
LOC100039400	100039400	0.27	0	0	0.15	0.14	0	0.14	0	0.211999	0.859414	0.0356239
LOC100039401	100039401	0	0	0	0	0	0	0	0	NA	NA	NA
LOC100039402	100039402	0	0	0	0	0	0	0	0	NA	NA	NA
LOC100039403	100039403	0	0	0.1	0	0.31	0.34	0.82	0.11	0.0561689	1.23926	-0.664133
LOC100039404	100039404	0	0.02	0	0	0.02	0.02	0	0.03	0	0	0
LOC100039405	100039405	0.25	0.16	0.17	0.17	0.97	1.03	0.89	1.03	0.148277	0.285598	0.0927104
LOC100039407	100039407	0	0.31	0.29	0	0.43	0.31	0.71	0.47	-0.306915	1.3578	-0.485427
LOC100039408	100039408	0	0	0	0	0.03	0	0	0	NA	NA	NA
LOC100039409	100039409	0.16	0.09	0.09	0.28	0.67	0.09	0.58	0.93	-0.954119	1.77189	-0.896377
LOC100039410	100039410	0	0	0	0	0	0	0	0.21	NA	NA	NA
LOC100039411	100039411	0	0	0	0	0.09	0	0	0	NA	NA	NA
LOC100039412	100039412	0	0	0.04	0	4.46	5.95	3.15	2.92	0.382153	0.490611	0.768726
LOC100039413	100039413	0	0	0	0	0	0	0	0.03	NA	NA	NA
LOC100039414	100039414	0	0	0	0	0.32	0.31	0.24	0.29	0.127813	0.196781	0.249359
LOC100039415	100039415	0	0	0	0	0	0	0.15	0	NA	NA	NA
LOC100039416	100039416	0	0	0	0	0	0	0	0	NA	NA	NA
LOC100039417	100039417	0.02	0.06	0.02	0.01	0.07	0.11	0.08	0.05	0.0343759	0.0687518	0
LOC100039418	100039418	0	0	0	0	0.03	0.02	0	0.02	0	0	0
LOC100039419	100039419	1.74	1.52	2.27	2.58	28.27	27.14	40.09	39.46	-0.547711	0.158516	-0.52462
LOC100039420	100039420	0	0	0	0	0	0	0	0	NA	NA	NA
LOC100039421	100039421	0	0	0	0	0	0	0	0	NA	NA	NA
LOC100039422	100039422	0	0.09	0.16	0.09	46.21	42.15	64.35	83.91	-0.537279	0.416334	-0.747626
LOC100039423	100039423	0	0	0	0	0	0	0	0	NA	NA	NA
LOC100039424	100039424	0	0	0	0	0	0	0	0	NA	NA	NA
LOC100039425	100039425	0.02	0.01	0.02	0.01	0.03	0.02	0.03	0.03	0	0	0
LOC100039426	100039426	0	0	0	0	0.01	0.01	0.01	0.02	0	0	0
LOC100039427	100039427	0.2	0.44	0.2	0.21	0.25	0.11	0.44	0.27	-0.260979	1.03435	-0.163499
LOC100039428	100039428	0	0	0	0	0	0	0	0	NA	NA	NA
LOC100039429	100039429	0	0	0	0	0	0	0	0	NA	NA	NA
LOC100039430	100039430	0	0	0	0	0.01	0	0.01	0	0	0	0
LOC100039431	100039431	0	0	0	0	93.27	109.06	137.33	134.79	-0.215938	0.269823	-0.427533
LOC100039432	100039432	0	0	0	0	0	0	0	0	NA	NA	NA
LOC100039433	100039433	0.23	0.05	0.05	0.05	0.09	0.2	0.05	0	0.550408	0.640866	0.510962
LOC100039434	100039434	0	0	0	0	0.25	0	0	0.28	-0.0408747	1.14707	0
LOC100039436	100039436	0	0	0	0	0	0	0	0	NA	NA	NA
LOC100039437	100039437	0	0	0	0	0	0	0	0	NA	NA	NA
LOC100039438	100039438	0	0	0	0	0	0	0	0.06	NA	NA	NA
LOC100039439	100039439	0.01	0	0	0	0.01	0.01	0.01	0	0	0	0
LOC100039440	100039440	0	0	0.13	0.41	0	0	0.25	0.28	NA	NA	NA
LOC100039441	100039441	0	0	0	0	0	0	0	0	NA	NA	NA
LOC100039442	100039442	0	0	0	0	0	0	0	0	NA	NA	NA
LOC100039444	100039444	0	0	0	0	0	0	0	0	NA	NA	NA
LOC100039445	100039445	0	0	0	0	0	0	0	0	NA	NA	NA
LOC100039446	100039446	0.09	0	0.09	0	0.09	0	0	0	0	0	0
LOC100039447	100039447	0	0	0	0	0.14	0	0.14	0	0	0	0
LOC100039448	100039448	0.01	0.02	0.02	0.02	1.14	1.2	1.52	1.5	-0.184241	0.216113	-0.368645
LOC100039449	100039449	0	0	0	0	0	0	0.02	0	NA	NA	NA
LOC100039450	100039450	0	0	0	0	0	0	0	0	NA	NA	NA
LOC100039451	100039451	0	0	0	0	0	0	0	0	NA	NA	NA
LOC100039452	100039452	0	0	0	0	0	0	0	0	NA	NA	NA
LOC100039453	100039453	0.05	0.05	0	0	0.15	0	0.05	0	0.146241	0.292481	0
LOC100039455	100039455	0	0	0	0	0	0	0	0	NA	NA	NA
LOC100039456	100039456	0	0.01	0.01	0	0.03	0.03	0.03	0.03	0	0	0
LOC100039457	100039457	0	0	0	0	0	0	0	0	NA	NA	NA
LOC100039458	100039458	0	0	0	0	0.43	0.38	0.22	0.05	0.723208	0.922338	1.01792
LOC100039459	100039459	0.18	0.3	0.72	0.1	0.54	0.69	0.98	0.99	-0.448923	1.49628	-0.706269
LOC100039460	100039460	0	0	0	0	0	0	0	0	NA	NA	NA
LOC100039461	100039461	0	0	0	0	0	0	0	0	NA	NA	NA
LOC100039462	100039462	0	0	0	0	0	0.01	0	0	NA	NA	NA
LOC100039463	100039463	0	0	0	0	0	0	0	0	NA	NA	NA
LOC100039464	100039464	0	0.02	0.01	0.02	0.65	0.49	0.73	0.66	-0.149285	0.202917	-0.291766
LOC100039465	100039465	0	0	0	0	0	0	0	0	NA	NA	NA
LOC100039466	100039466	0.23	0	0	0.13	0.23	0.12	0.11	0.25	0.20709	1.10594	0.243271
LOC100039467	100039467	0	0	0	0	0	0	0	0	NA	NA	NA
LOC100039468	100039468	0	0	0	0	0	0	0	0	NA	NA	NA
LOC100039469	100039469	0.5	0.92	0.59	0.64	0.59	0.74	0.75	0.65	0.0314213	0.400843	0.0643688
LOC100039470	100039470	0.05	0.02	0.04	0.04	0.05	0.04	0.07	0.04	0	0	0
LOC100039471	100039471	0	0	0	0	0	0	0	0.01	NA	NA	NA
LOC100039472	100039472	0	0	0	0	0	0	0	0	NA	NA	NA
LOC100039473	100039473	0	0	0	0	0	0	0	0	NA	NA	NA
LOC100039474	100039474	1.22	0.44	1.13	1.52	61.32	44.74	70.68	68.68	-0.625302	0.830915	-0.398706
LOC100039475	100039475	0	0	0	0	0	0	0	0	NA	NA	NA
LOC100039476	100039476	0.54	0.37	0.6	0.89	0.68	0.52	0.81	1.11	-0.691162	0.570449	-0.692529
LOC100039477	100039477	0	0	0	0	0	0	0	0	NA	NA	NA
LOC100039478	100039478	0.11	0.25	0.45	0.37	5.11	5	7	6.99	-0.883854	0.767167	-0.50031
LOC100039479	100039479	0	0	0	0	0	0	0	0	NA	NA	NA
LOC100039481	100039481	0	0	0	0	0	0	0	0	NA	NA	NA
LOC100039482	100039482	0	0	0	0	0	0	0	0	NA	NA	NA
LOC100039483	100039483	21.28	22.31	19.36	19.89	21.12	22.73	18.86	18.84	0.184036	0.0593411	0.184372
LOC100039484	100039484	0	0	0	0	4.03	3.96	3.95	4.37	-0.0283014	0.0771031	-0.058388
LOC100039485	100039485	0	0	0	0	0.32	0.18	0.16	0	0.461999	0.537068	0.321928
LOC100039486	100039486	0	0	0	0	0	0	0	0	NA	NA	NA
LOC100039487	100039487	0	0	0	0	0	0	0.05	0	NA	NA	NA
LOC100039488	100039488	0	0	0	0	0	0	0	0	NA	NA	NA
LOC100039489	100039489	0.2	0.04	0.08	0.13	29.36	32.58	19.96	21.02	0.452613	0.586942	0.594156
LOC100039490	100039490	0	0	0	0	0	0	0	0	NA	NA	NA
LOC100039491	100039491	0.15	0	0	0	0	0	0	0	NA	NA	NA
LOC100039492	100039492	0	0	0	0	0	0	0	0	NA	NA	NA
LOC100039493	100039493	0.02	0	0.02	0.02	0	0.02	0.02	0.05	0	0	0
LOC100039494	100039494	0	0.11	0.1	0.11	0.29	0.11	0.97	0.43	-0.927191	1.07456	-1.65849
LOC100039495	100039495	0.32	0.27	0.18	0.17	0.32	0.4	0.27	0.17	0.744269	0.409356	0.729642
LOC100039496	100039496	0	0	0.05	0	0.05	0.05	0	0.06	0	0	0
LOC100039497	100039497	0	0	0	0	0	0	0	0	NA	NA	NA
LOC100039498	100039498	0	0	0	0	0	0	0	0	NA	NA	NA
LOC100039499	100039499	0	0	0	0	0	0	0	0	NA	NA	NA
LOC100039500	100039500	0	0	0	0	0	0	0	0	NA	NA	NA
LOC100039501	100039501	7.08	7.36	9.53	10	7.01	8.32	8.98	11.3	-0.417479	0.0406005	-0.419272
LOC100039502	100039502	0	0	0	0	0.06	0	0	0	NA	NA	NA
LOC100039503	100039503	0	0	0	0	4.63	4.56	4.54	5.02	-0.0275834	0.0752406	-0.0569458
LOC100039504	100039504	0	0	0	0	0	0	0	0	NA	NA	NA
LOC100039505	100039505	0	0	0	0	0	0	0	0	NA	NA	NA
LOC100039506	100039506	0.02	0.02	0.02	0.02	0.05	0.04	0.05	0.05	0	0	0
LOC100039507	100039507	0	0	0	0	0	0	0.02	0	NA	NA	NA
LOC100039508	100039508	0	0	0	0	0	0	0	0	NA	NA	NA
LOC100039509	100039509	0.02	0.02	0.02	0	0.02	0.03	0.02	0.03	0	0	0
LOC100039510	100039510	0	0	0	0	0	0	0	0	NA	NA	NA
LOC100039511	100039511	0	0	0	0	0	0	0.01	0	NA	NA	NA
LOC100039513	100039513	0	0	0	0	0	0	0	0	NA	NA	NA
LOC100039514	100039514	0	0	0.02	0	0.06	0.02	0.01	0	0	0	0
LOC100039515	100039515	0	0	0	0	0	0	0	0	NA	NA	NA
LOC100039516	100039516	0	0	0	0	0	0	0	0	NA	NA	NA
LOC100039517	100039517	0	0	0	0	0	0	0	0	NA	NA	NA
LOC100039518	100039518	0	0	0	0	0	0	0	0	NA	NA	NA
LOC100039519	100039519	0	0	0	0	0	0	0	0	NA	NA	NA
LOC100039520	100039520	0	0	0	0	0	0	0	0	NA	NA	NA
LOC100039521	100039521	0	0	0.09	0	0	0	0	0	NA	NA	NA
LOC100039522	100039522	0	0	0	0	0	0	0	0	NA	NA	NA
LOC100039523	100039523	0	0	0	0	0	0	0	0	NA	NA	NA
LOC100039524	100039524	0	0	0	0	0	0	0	0	NA	NA	NA
LOC100039525	100039525	0.18	0.2	0.36	0.2	1.6	1.96	2.48	1.56	-0.32574	0.601049	-0.223438
LOC100039526	100039526	0	0	0	0	0	0	0	0	NA	NA	NA
LOC100039527	100039527	0	0	0	0	0	0	0	0	NA	NA	NA
LOC100039528	100039528	0	0	0	0	0	0	0	0	NA	NA	NA
LOC100039529	100039529	0	0	0	0	0.01	0.01	0.01	0.01	0	0	0
LOC100039531	100039531	0	0	0	0	0	0	0	0	NA	NA	NA
LOC100039532	100039532	0.1	0	0.29	0.32	6.57	6.61	9.9	13.71	-1.21454	0.494173	-0.866944
LOC100039533	100039533	0	0	0	0	0	0	0	0	NA	NA	NA
LOC100039534	100039534	0	0	0	0	0	0	0	0	NA	NA	NA
LOC100039535	100039535	13.98	16.53	13.37	15.24	238.84	256.36	210.98	215.75	0.152334	0.0795546	0.207323
LOC100039536	100039536	0	0	0.14	0.08	0.07	0	0.07	0.16	-0.290875	0.344958	-0.169925
LOC100039538	100039538	0	0	0	0	0	0	0	0	NA	NA	NA
LOC100039539	100039539	0	0	0	0	0.01	0.01	0	0.01	0	0	0
LOC100039540	100039540	0	0	0	0.01	0.1	0.1	0.11	0.15	-0.180617	0.277248	0
LOC100039541	100039541	0	0	0	0	0	0	0	0	NA	NA	NA
LOC100039542	100039542	0	0	0	0	0	0	0	0	NA	NA	NA
LOC100039543	100039543	0	0.02	0	0	0	0.02	0	0	NA	NA	NA
LOC100039544	100039544	0.13	0.13	0.06	0.12	0.67	0.44	0.42	0.47	0.268151	0.332671	0.356565
LOC100039545	100039545	0	0	0	0	0	0	0	0	NA	NA	NA
LOC100039546	100039546	0	0	0	0	0	0	0	0	NA	NA	NA
LOC100039547	100039547	0	0.27	0.25	0.55	0.12	0.27	0.13	0.28	-0.629086	0.641412	-0.874469
LOC100039548	100039548	0	0	0	0	0	0	0	0	NA	NA	NA
LOC100039549	100039549	0	0.12	0	0.03	0	0.02	0	0.03	0.0657586	0.131517	0
LOC100039550	100039550	0	0	0	0	0	0	0	0	NA	NA	NA
LOC100039551	100039551	0	0	0	0	0	0	0	0	NA	NA	NA
LOC100039552	100039552	0	0	0	0	0	0	0	0	NA	NA	NA
LOC100039553	100039553	0	0	0	0	0	0	0	0	NA	NA	NA
LOC100039554	100039554	0	0	0	0	0	0	0	0	NA	NA	NA
LOC100039555	100039555	0	0	0	0	0	0	0	0	NA	NA	NA
LOC100039556	100039556	0.4	0.28	0.54	0.24	2.41	1.44	2.14	1	0.121731	0.401569	0.208657
LOC100039557	100039557	0	0	0	0	0	0	0	0	NA	NA	NA
LOC100039558	100039558	0.11	0	0	0.13	0.9	0.87	0.83	0.95	-0.0627766	0.242327	-0.02284
LOC100039559	100039559	0	0	0	0	0	0	0	0	NA	NA	NA
LOC100039560	100039560	0	0	0	0	0	0	0	0	NA	NA	NA
LOC100039561	100039561	0	0	0	0	0.01	0.01	0.02	0.01	0	0	0
LOC100039562	100039562	0	0.05	0	0	0	0.09	0	0	NA	NA	NA
LOC100039563	100039563	0	0	0	0	0.22	0.37	0.44	0.49	-0.351314	0.472774	-0.656516
LOC100039565	100039565	0.04	0.02	0.05	0.06	0.04	0.04	0.05	0.05	0	0	0
LOC100039566	100039566	0	0	0	0	0.01	0.02	0.02	0.01	0	0	0
LOC100039567	100039567	0	0	0	0	0.2	0	0	0	NA	NA	NA
LOC100039568	100039568	0	0	0	0	0	0	0	0.02	NA	NA	NA
LOC100039569	100039569	0	0	0	0	0	0	0	0	NA	NA	NA
LOC100039570	100039570	0	0	0	0	0	0	0	0	NA	NA	NA
LOC100039571	100039571	0.08	0	0	0	55.72	59.34	86.14	93.05	-0.319372	0.368874	-0.638101
LOC100039572	100039572	0	0	0	0	0	0	0	0	NA	NA	NA
LOC100039573	100039573	0	0	0	0	0	0	0	0	NA	NA	NA
LOC100039574	100039574	0	0	0	0	0	0	0	0	NA	NA	NA
LOC100039575	100039575	0	0	0	0	0.73	0.75	1.11	0.94	-0.23259	0.291698	-0.470027
LOC100039576	100039576	0	0	0	0	0	0	0	0	NA	NA	NA
LOC100039577	100039577	0.16	0.07	0.06	0.06	0.14	0.15	0.12	0.05	0.371357	0.316121	0.378512
LOC100039578	100039578	0	0	0	0	0	0	0	0	NA	NA	NA
LOC100039579	100039579	0.01	0	0.01	0	0.02	0.02	0.01	0.04	0	0	0
LOC100039580	100039580	0	0	0	0	0.02	0	0.02	0	0	0	0
LOC100039581	100039581	1.31	0	0	0	2.62	2.8	2.36	2.7	0.978686	1.82294	0.411469
LOC100039582	100039582	0	0	0	0	0	0	0	0	NA	NA	NA
LOC100039583	100039583	0	0	0	0	0.15	0.22	0.37	0.36	-0.503264	0.629384	-0.867896
LOC100039584	100039584	0	0	0	0	0.02	0	0	0	NA	NA	NA
LOC100039585	100039585	0	0	0	0	0	0	0	0	NA	NA	NA
LOC100039586	100039586	0	0	0	0	0	0	0	0	NA	NA	NA
LOC100039587	100039587	0	0	0	0	0	0	0	0	NA	NA	NA
LOC100039588	100039588	0.02	0	0	0	0.13	0.14	0.1	0.16	0.0464666	0.239267	0
LOC100039589	100039589	0	0	0	0	0.06	0.06	0.04	0.02	0	0	0
LOC100039590	100039590	5.14	4.88	3.27	3.6	4.83	4.78	2.78	3.71	0.563473	0.197575	0.55514
LOC100039592	100039592	0	0	0.02	0	16.76	14.83	17.87	19.32	-0.118523	0.18071	-0.236222
LOC100039595	100039595	0	0	0	0	0	0	0	0	NA	NA	NA
LOC100039596	100039596	0	0	0	0	0	0	0	0	NA	NA	NA
LOC100039597	100039597	0	0	0	0	0.15	0	0	0	NA	NA	NA
LOC100039598	100039598	0	0	0	0	0	0	0	0	NA	NA	NA
LOC100039599	100039599	0.04	0.03	0.02	0.02	0.07	0.08	0.05	0.04	0	0	0
LOC100039600	100039600	0.09	0	0	0.1	0	0	0.27	0	-0.35824	0.71648	0
LOC100039601	100039601	0	0	0	0	0	0	0	0	NA	NA	NA
LOC100039602	100039602	0	0	0	0	0	0	0	0	NA	NA	NA
LOC100039603	100039603	0	0	0	0	0	0.27	0	0	NA	NA	NA
LOC100039604	100039604	0	0	0	0	0.5	0.37	0	0	NA	NA	NA
LOC100039605	100039605	0.76	0.75	0.37	0.41	0.91	0.92	0.08	0.59	1.43413	1.17914	1.2038
LOC100039606	100039606	0	0	0	0	0	0	0	0	NA	NA	NA
LOC100039607	100039607	0.38	0.58	0.46	0.4	0.55	0.67	0.4	0.42	0.348405	0.425373	0.375867
LOC100039608	100039608	0	0	0	0	0.01	0.01	0.01	0.01	0	0	0
LOC100039609	100039609	0	0	0	0	0.23	0	0.11	0.25	-0.0644494	0.976943	0
LOC100039610	100039610	0	0	0	0	0	0	0	0	NA	NA	NA
LOC100039611	100039611	0.07	0	0	0.08	0.07	0	0.3	0.17	-0.587624	0.756514	-0.459432
LOC100039612	100039612	0	0	0	0	0	0	0.01	0	NA	NA	NA
LOC100039613	100039613	0	0	0	0	0	0	0	0	NA	NA	NA
LOC100039614	100039614	0	0	0	0	0	0	0	0	NA	NA	NA
LOC100039615	100039615	0	0	0	0	0	0	0	0	NA	NA	NA
LOC100039616	100039616	9.07	9.1	11.67	10.5	9.34	9.48	11.57	10.57	-0.258998	0.0941612	-0.260497
LOC100039617	100039617	0	0	0	0	0	0	0	0	NA	NA	NA
LOC100039618	100039618	0	0	0	0	0	0	0	0	NA	NA	NA
LOC100039619	100039619	0	0	0	0	0	0	0	0	NA	NA	NA
LOC100039620	100039620	0	0	0	0	0	0	0	0	NA	NA	NA
LOC100039621	100039621	0	0	0	0	0	0	0	0	NA	NA	NA
LOC100039622	100039622	0	0	0	0	0	0	0	0	NA	NA	NA
LOC100039623	100039623	0.86	0.95	0.78	0.56	17.17	23.01	19.48	15.83	0.315215	0.419578	0.196233
LOC100039624	100039624	1.6	1.87	3.1	2.79	14.3	19.34	22.95	19.82	-0.562318	0.385532	-0.390928
LOC100039626	100039626	0.12	0.23	0.14	0.09	0.18	0.27	0.18	0.18	0.391051	0.638717	0.439285
LOC100039627	100039627	0	0.07	0	0	0.2	0.3	0.07	0	0.646241	0.783496	0.510962
LOC100039628	100039628	0	0	0	0	0	0	0	0	NA	NA	NA
LOC100039629	100039629	0	0	0	0	0	0	0	0	NA	NA	NA
LOC100039630	100039630	0	0	0	0	0	0	0	0	NA	NA	NA
LOC100039631	100039631	0	0	0	0	0	0.15	0	0.04	0.146241	0.292481	0
LOC100039632	100039632	0.75	0.91	1	0.82	0.66	0.97	0.61	0.82	0.0228057	0.296876	0.0176479
LOC100039633	100039633	0	0	0	0	0	0	0	0	NA	NA	NA
LOC100039634	100039634	0.92	0.08	0.38	0.33	0.69	0.33	0.68	0.84	-0.443423	1.3693	-0.142688
LOC100039635	100039635	0	0	0	0	0	0	0	0	NA	NA	NA
LOC100039636	100039636	5.29	6.31	3.84	3.47	125.93	137.83	87.59	88.27	0.622886	0.176604	0.588136
LOC100039637	100039637	0	0	0	0	0	0	0	0	NA	NA	NA
LOC100039638	100039638	0	0	0	0	0.01	0	0	0.01	0	0	0
LOC100039639	100039639	5.07	3.62	6.61	6.04	153.93	149.16	192.69	203.67	-0.473651	0.183882	-0.391608
LOC100039641	100039641	0	0	0	0	0	0	0	0	NA	NA	NA
LOC100039643	100039643	0	0	0	0	0.32	0.18	0.65	0.89	-0.832044	1.09435	-1.62293
LOC100039644	100039644	0.01	0	0	0	0	0	0	0	NA	NA	NA
LOC100039645	100039645	0.26	0.29	0.87	1.06	273.26	328.47	621.89	515.54	-1.36229	0.559795	-0.919717
LOC100039646	100039646	0	0	0	0	0	0	0	0	NA	NA	NA
LOC100039647	100039647	0	0	0	0	0	0	0	0	NA	NA	NA
LOC100039648	100039648	0	0	0	0	0.06	0	0	0.03	0	0	0
LOC100039649	100039649	0.02	0.02	0	0	0	0	0	0	NA	NA	NA
LOC100039650	100039650	0	0	0	0	0	0	0	0	NA	NA	NA
LOC100039651	100039651	0	0	0	0	0	0	0.01	0	NA	NA	NA
LOC100039652	100039652	0	0	0	0	0.03	0	0	0	NA	NA	NA
LOC100039653	100039653	0	0	0	0	0	0	0	0	NA	NA	NA
LOC100039654	100039654	0	0	0	0	0	0	0	0	NA	NA	NA
LOC100039655	100039655	0	0	0	0	0	0	0	0	NA	NA	NA
LOC100039656	100039656	0	0	0	0	99.71	113.24	112.31	113.17	-0.042696	0.0859879	-0.0824847
LOC100039657	100039657	0	0	0	0	0	0	0	0	NA	NA	NA
LOC100039658	100039658	0	0	0	0	0	0	0	0	NA	NA	NA
LOC100039659	100039659	0	0	0	0	0	0	0	0	NA	NA	NA
LOC100039660	100039660	0	0	0	0	0.02	0	0	0	NA	NA	NA
LOC100039661	100039661	0	0	0	0	0	0	0	0	NA	NA	NA
LOC100039662	100039662	0.02	0	0	0	0	0	0	0	NA	NA	NA
LOC100039663	100039663	0.24	0.65	0.95	0.39	0.35	0.26	0.7	0.26	-0.561982	1.18598	-0.616671
LOC100039664	100039664	0	0	0	0.06	0.15	0.33	0.95	0.72	-0.947124	1.26096	-1.84967
LOC100039665	100039665	2.64	2.6	3.58	3.11	9.36	11.57	12.32	13.2	-0.321099	0.116551	-0.299595
LOC100039666	100039666	0	0	0	0	0	0	0	0	NA	NA	NA
LOC100039667	100039667	0.13	0	0	0	0.13	0	0	0	NA	NA	NA
LOC100039668	100039668	0.15	0.27	0.42	0.3	3.42	3.1	4.42	3.96	-0.590178	0.604998	-0.390931
LOC100039669	100039669	0	0	0	0	0.01	0	0.01	0	0	0	0
LOC100039670	100039670	0	0	0	0	0	0	0	0	NA	NA	NA
LOC100039671	100039671	0	0	0	0	0	0	0	0	NA	NA	NA
LOC100039672	100039672	5.54	6.23	4.28	6.47	5.55	6.62	4.5	6.35	0.170095	0.200821	0.148392
LOC100039673	100039673	0	0	0	0	0	0	0	0	NA	NA	NA
LOC100039674	100039674	0	0	0	0	0	0	0	0	NA	NA	NA
LOC100039675	100039675	0	0	0	0	0	0	0	0	NA	NA	NA
LOC100039676	100039676	0	0	0	0	0	0	0	0	NA	NA	NA
LOC100039677	100039677	0.35	0.29	0.7	0.77	1.94	0.87	2.01	1.55	-0.823281	0.568733	-0.543962
LOC100039678	100039678	0.02	0.05	0.02	0.01	0.01	0.02	0.02	0.02	0	0	0
LOC100039679	100039679	0	0	0	0	0	0	0	0	NA	NA	NA
LOC100039680	100039680	0	0	0	0	0.1	0.11	0	0.11	0	0	0
LOC100039681	100039681	0.09	0	0	0.05	0.05	0	0	0	0	0	0
LOC100039683	100039683	0.26	0.22	0.06	0.1	7.09	6.14	2.5	2.73	1.2973	0.174328	1.34687
LOC100039684	100039684	0.23	0.07	0	0.06	0.34	0.07	0.06	0.13	0.647164	1.00483	0.827819
LOC100039685	100039685	0	0	0	0	0	0	0	0	NA	NA	NA
LOC100039686	100039686	1.57	2.59	2.41	1.15	1.5	2.01	1.95	1.22	0.223713	0.859491	0.18862
LOC100039687	100039687	0	0	0	0	0.02	0	0	0	NA	NA	NA
LOC100039688	100039688	0	0	0	0	0.01	0	0.01	0.01	0	0	0
LOC100039689	100039689	0	0	0	0	1.71	1.89	2.04	1.76	-0.0379405	0.152337	-0.0780025
LOC100039690	100039690	0	0	0	0	0	0	0	0	NA	NA	NA
LOC100039691	100039691	0	0	0	0	0	0	0	0	NA	NA	NA
LOC100039692	100039692	0	0	0	0	0	0	0	0	NA	NA	NA
LOC100039693	100039693	0	0	0	0	0	0	0	0	NA	NA	NA
LOC100039694	100039694	0	0	0	0	0	0	0	0	NA	NA	NA
LOC100039695	100039695	0.38	0.21	0.57	0.21	153.56	83.64	165.09	143.19	-0.36627	0.373334	-0.378199
LOC100039696	100039696	1.07	0.88	0.97	0.78	0.8	0.88	0.8	0.78	0.122403	0.0830258	0.124447
LOC100039697	100039697	0	0	0	0	0	0	0	0	NA	NA	NA
LOC100039698	100039698	0	0	0	0	0	0	0	0.03	NA	NA	NA
LOC100039699	100039699	0	0	0	0	0.03	0.06	0	0	NA	NA	NA
LOC100039700	100039700	0	0	0	0	0	0.03	0	0	NA	NA	NA
LOC100039701	100039701	0	0	0	0	0	0	0	0	NA	NA	NA
LOC100039702	100039702	0	0	0	0	0	0	0	0	NA	NA	NA
LOC100039703	100039703	0	0	0	0	0	0	0	0	NA	NA	NA
LOC100039704	100039704	0	0	0	0	0	0	0	0	NA	NA	NA
LOC100039705	100039705	0	0	0	0	0	0	0	0	NA	NA	NA
LOC100039706	100039706	0	0	0	0	0.02	0	0	0.02	0	0	0
LOC100039707	100039707	0.02	0.04	0.04	0.03	0.37	0.35	0.43	0.35	-0.0542028	0.108406	-0.123989
LOC100039708	100039708	0	0	0	0	0	0	0	0	NA	NA	NA
LOC100039709	100039709	0.94	0.49	0.72	0.36	3.78	2.39	3.76	2.57	0.183086	0.272489	0.0365259
LOC100039711	100039711	0.02	0.02	0.07	0	0	0.02	0.08	0.03	0	0	0
LOC100039712	100039712	0	0	0	0	0	0	0	0	NA	NA	NA
LOC100039713	100039713	0	0	0	0	0	0	0	0.01	NA	NA	NA
LOC100039714	100039714	0	0	0	0	0	0	0	0	NA	NA	NA
LOC100039715	100039715	0	0	0	0.07	0	0	0.06	0	NA	NA	NA
LOC100039716	100039716	0.01	0.02	0.03	0.03	0.46	0.51	0.65	0.66	-0.217694	0.256649	-0.454176
LOC100039717	100039717	0	0	0	0	0	0	0	0	NA	NA	NA
LOC100039718	100039718	0	0	0	0	0	0	0	0	NA	NA	NA
LOC100039719	100039719	0	0	0	0	0	0.13	0.11	0	0.060252	0.221854	0
LOC100039720	100039720	0.25	0.07	0.12	0.06	37.26	32.05	54.85	46.57	-0.0095117	0.757784	-0.545119
LOC100039721	100039721	0.11	0	0.1	0	0	0	0.11	0	0	0.112271	0
LOC100039722	100039722	0	0	0	0	0	0	0	0	NA	NA	NA
LOC100039723	100039723	0	0	0	0	0.69	0.89	0.46	0.44	0.400316	0.494651	0.811928
LOC100039724	100039724	0	0	0	0	0	0	0	0	NA	NA	NA
LOC100039725	100039725	0	0	0.05	0	0.67	0.54	0.53	0.49	0.119587	0.160004	0.177396
LOC100039726	100039726	0	0	0	0	0.12	0.13	0.11	0.08	0.126011	0.178432	0
LOC100039727	100039727	0	0	0	0	0	0	0	0	NA	NA	NA
LOC100039728	100039728	0	0	0	0	0	0	0	0	NA	NA	NA
LOC100039729	100039729	0	0	0	0	0	0	0	0	NA	NA	NA
LOC100039730	100039730	1.54	1.33	1.34	1.73	7.72	6.55	8.35	8.01	-0.145533	0.255963	-0.180919
LOC100039731	100039731	0.08	0	0.08	0	333.01	312.22	373.94	508.5	-0.217732	0.333424	-0.451637
LOC100039732	100039732	0	0	0	0	0	0	0	0	NA	NA	NA
LOC100039733	100039733	0	0	0	0	0	0	0	0	NA	NA	NA
LOC100039734	100039734	0	0	0	0	0	0	0	0	NA	NA	NA
LOC100039735	100039735	0	0	0	0	0.7	0.63	0.51	0.63	0.114214	0.228429	0.222392
LOC100039736	100039736	0	0	0	0	0	0	0	0	NA	NA	NA
LOC100039737	100039737	0	0	0	0	0	0	0	0	NA	NA	NA
LOC100039738	100039738	0	0	0	0	0	0	0	0	NA	NA	NA
LOC100039739	100039739	0	0	0	0	0	0	0	0	NA	NA	NA
LOC100039740	100039740	61.24	59.21	99.11	94.37	1276.18	1230.58	1861.05	1819.38	-0.618859	0.0756417	-0.560259
LOC100039741	100039741	0	0	0	0	0	0	0	0	NA	NA	NA
LOC100039742	100039742	0.18	0.07	0.06	0	3.12	2.69	0.83	0.69	1.18032	0.939689	1.93939
LOC100039743	100039743	0.02	0	0.02	0.02	0.02	0.06	0.04	0.08	0	0	0
LOC100039744	100039744	0	0	0	0	0	0	0	0	NA	NA	NA
LOC100039745	100039745	0	0	0	0	0.01	0	0	0	NA	NA	NA
LOC100039746	100039746	0.17	0.23	0.28	0.21	0.32	0.31	0.45	0.31	-0.270125	0.402293	-0.279284
LOC100039747	100039747	0	0	0	0	0.22	0.25	0.22	0.25	0	0	0
LOC100039748	100039748	0.48	0.47	0.59	0.59	40.26	42.61	45.33	48.05	-0.24255	0.0821425	-0.173936
LOC100039749	100039749	0.02	0.05	0	0.02	2.04	2.25	2.14	2.27	-0.0204522	0.0329473	-0.0229786
LOC100039750	100039750	0.39	0.37	0.61	0.62	1.79	1.3	3.8	1.91	-0.757795	0.232137	-0.850077
LOC100039751	100039751	0	0	0	0	3.56	4.46	5.75	6.35	-0.300349	0.354681	-0.593333
LOC100039752	100039752	0	0	0	0	0	0	0	0	NA	NA	NA
LOC100039753	100039753	0	0	0	0	0	0	0	0	NA	NA	NA
LOC100039754	100039754	0	0	0	0	0	0	0	0	NA	NA	NA
LOC100039755	100039755	0	0	0	0	0	0.06	0.15	0.06	-0.146241	0.292481	0
LOC100039756	100039756	0.02	0.02	0.02	0.02	0.03	0.02	0.02	0.01	0	0	0
LOC100039757	100039757	0	0	0	0	0	0	0	0	NA	NA	NA
LOC100039758	100039758	0	0	0	0	0	0	0	0	NA	NA	NA
LOC100039759	100039759	0	0	0	0	0	0	0	0	NA	NA	NA
LOC100039760	100039760	24.99	19.78	23.05	19.41	462.08	416.68	568.85	492.42	-0.0992572	0.202424	-0.257157
LOC100039761	100039761	0	0.02	0	0	0.03	0	0.03	0.02	0	0	0
LOC100039762	100039762	0.77	0.72	1.25	0.64	2.2	1.42	1.72	1.17	0.0263512	0.489504	0.0963127
LOC100039763	100039763	0	0	0	0	0	0	0	0	NA	NA	NA
LOC100039764	100039764	0	0	0	0	0.69	0.63	0.51	0.63	0.109025	0.21805	0.211504
LOC100039765	100039765	0	0	0	0	0	0	0.13	0	NA	NA	NA
LOC100039766	100039766	0	0	0	0	1.29	1.24	0.99	0.95	0.191553	0.221188	0.383081
LOC100039767	100039767	0	0	0	0	0	0	0	0	NA	NA	NA
LOC100039768	100039768	0.19	0.72	0.28	0.31	0.19	0.82	0	0.21	0.886884	1.05898	1.26303
LOC100039769	100039769	0	0	0	0	0.02	0	0.02	0	0	0	0
LOC100039770	100039770	0	0	0	0	0	0	0	0	NA	NA	NA
LOC100039771	100039771	0.23	0.04	0.14	0.12	0.62	0.46	0.52	0.52	0.132513	0.450029	0.0544478
LOC100039772	100039772	0	0	0	0	0	0	0	0	NA	NA	NA
LOC100039773	100039773	0	0	0.33	0	0	0	0.22	0	NA	NA	NA
LOC100039774	100039774	0.86	0.72	0.75	0.86	4.3	3.93	3.97	4.37	-0.0242	0.215301	-0.0204434
LOC100039775	100039775	0.05	0.05	0.04	0.02	0.34	0.41	0.31	0.29	0.158209	0.236086	0.364997
LOC100039777	100039777	0	0	0	0	0	0	0	0	NA	NA	NA
LOC100039778	100039778	0.17	0.07	0.06	0.06	0.11	0.31	0.11	0.06	0.599451	0.777384	0.722466
LOC100039779	100039779	0	0	0	0	0	0	0	0	NA	NA	NA
LOC100039780	100039780	0	0	0	0	0	0	0	0.1	NA	NA	NA
LOC100039781	100039781	0	0	0	0	0	0	0	0	NA	NA	NA
LOC100039782	100039782	0.07	0	0	0	12.79	13.73	19.26	17.08	-0.226392	0.284602	-0.450675
LOC100039783	100039783	0	0	0	0	0	0	0	0	NA	NA	NA
LOC100039784	100039784	0	0	0	0	0	0	0	0	NA	NA	NA
LOC100039785	100039785	0	0	0	0	0	0	0	0	NA	NA	NA
LOC100039786	100039786	0	0	0.03	0	29.56	30.95	30.21	30.05	0.00279863	0.0303642	0.00525486
LOC100039787	100039787	0.04	0.05	0.17	0	0.34	0.24	0.17	0.14	0.253018	0.803045	0.481127
LOC100039788	100039788	0	0.22	0	0	0	0.07	0	0	NA	NA	NA
LOC100039789	100039789	0	0	0	0	0	0	0	0	NA	NA	NA
LOC100039790	100039790	0	0	0	0	0	0	0	0	NA	NA	NA
LOC100039792	100039792	0	0	0	0	0	0	0	0	NA	NA	NA
LOC100039793	100039793	0	0	0	0	0	0	0	0	NA	NA	NA
LOC100039794	100039794	0.02	0	0	0	0.69	0.85	0.64	0.66	0.11838	0.172187	0.263034
LOC100039795	100039795	1.01	0.81	0.43	0.37	1.01	0.81	0.32	0.3	1.36338	0.233326	1.35805
LOC100039796	100039796	0.03	0.04	0.02	0.04	0.06	0.07	0.03	0.05	0	0	0
LOC100039797	100039797	0.02	0.04	0.02	0.01	0.06	0.09	0.04	0.06	0	0	0
LOC100039798	100039798	0.34	1.05	1.21	1.14	0.43	0.96	1.3	1.43	-1.03026	0.816577	-0.869744
LOC100039799	100039799	0	0	0	0	0	0	0	0	NA	NA	NA
LOC100039800	100039800	0	0	0	0	0	0	0	0	NA	NA	NA
LOC100039801	100039801	0	0	0	0	0.07	0	0	0	NA	NA	NA
LOC100039802	100039802	0	0	0	0.01	0.01	0.01	0.02	0.01	0	0	0
LOC100039803	100039803	0	0	0	0	0	0	0	0	NA	NA	NA
LOC100039804	100039804	0	0	0	0	0.02	0.04	0.02	0.01	0	0	0
LOC100039805	100039805	2.1	2.63	1.22	1.19	2.46	2.56	0.93	1.12	1.1309	0.257488	1.12836
LOC100039806	100039806	0	0	0	0	0	0	0	0	NA	NA	NA
LOC100039807	100039807	0	0	0	0	0	0	0	0	NA	NA	NA
LOC100039808	100039808	0	0	0	0	0	0	0	0	NA	NA	NA
LOC100039810	100039810	0	0	0	0	0	0	0	0	NA	NA	NA
LOC100039811	100039811	0	0	0	0	0	0	0	0	NA	NA	NA
LOC100039812	100039812	0	0	0.17	0	22.66	22.9	31.94	32.85	-0.445324	0.320934	-0.511784
LOC100039814	100039814	0.08	0	0	0.09	8.12	7.71	9.72	8.62	-0.105108	0.12786	-0.212122
LOC100039815	100039815	0	0	0	0	1.57	1.73	1.73	1.66	-0.0201047	0.0847273	-0.0388192
LOC100039816	100039816	0	0	0	0	0	0	0	0	NA	NA	NA
LOC100039817	100039817	0	0	0	0	0	0	0	0	NA	NA	NA
LOC100039818	100039818	0.01	0	0	0	0.01	0.01	0.02	0	0	0	0
LOC100039819	100039819	0	0	0	0	0	0	0	0	NA	NA	NA
LOC100039820	100039820	0.69	0.45	0.83	0.3	86.25	67.66	124.72	102.76	-0.204138	0.545632	-0.560155
LOC100039821	100039821	0	0	0	0	0	0	0	0	NA	NA	NA
LOC100039822	100039822	0	0	0	0	0	0	0	0	NA	NA	NA
LOC100039823	100039823	0	0	0	0	0	0	0	0	NA	NA	NA
LOC100039824	100039824	0	0	0	0	0	0	0	0	NA	NA	NA
LOC100039825	100039825	0	0.01	0.02	0	0.05	0.03	0.05	0.09	0	0	0
LOC100039826	100039826	30.85	27.23	23.7	23.58	68.09	62.24	56.63	52.39	0.275611	0.0739938	0.269558
LOC100039827	100039827	0.67	0.54	0.33	0.66	6.02	4.32	4.04	4.18	0.338781	0.577909	0.32662
LOC100039828	100039828	0	0	0	0	0.38	0.17	0.76	0.5	-0.639098	0.772134	-1.19592
LOC100039829	100039829	0	0	0	0	0	0	0	0	NA	NA	NA
LOC100039830	100039830	0	0	0	0	1.57	1.73	1.73	1.66	-0.0201047	0.0847273	-0.0388192
LOC100039831	100039831	0	0	0	0	0	0	0	0	NA	NA	NA
LOC100039832	100039832	0	0	0	0	0	0	0	0	NA	NA	NA
LOC100039833	100039833	0.19	0.07	0	0	0.07	0.14	0	0	NA	NA	NA
LOC100039834	100039834	0	0	0	0	0	0	0	0	NA	NA	NA
LOC100039835	100039835	0	0	0.12	0	0.35	0	0.35	0.13	-0.160387	0.191105	-0.584963
LOC100039836	100039836	0	0	0	0	0	0	0	0	NA	NA	NA
LOC100039837	100039837	0	0	0	0	0	0	0	0	NA	NA	NA
LOC100039838	100039838	0	0	0	0	0.01	0.01	0.01	0.01	0	0	0
LOC100039839	100039839	0	0	0	0	0	0	0	0	NA	NA	NA
LOC100039840	100039840	0.17	0.19	0.17	0.33	2.6	1.8	1.61	1.87	-0.0400143	0.608026	0.258193
LOC100039842	100039842	0	0	0	0	0	0	0	0	NA	NA	NA
LOC100039843	100039843	0	0	0	0	0	0	0	0	NA	NA	NA
LOC100039844	100039844	0	0	0	0	0	0	0	0	NA	NA	NA
LOC100039845	100039845	0	0	0	0	0.01	0.01	0	0	NA	NA	NA
LOC100039846	100039846	0.02	0.02	0.02	0.02	0.04	0.02	0.03	0.04	0	0	0
LOC100039847	100039847	0.07	0	0.08	0	0.07	0	0	0	0	0	0
LOC100039848	100039848	0	0	0	0	0	0	0	0	NA	NA	NA
LOC100039849	100039849	0	0	0	0	0	0	0	0	NA	NA	NA
LOC100039850	100039850	0	0	0	0	0	0	0	0	NA	NA	NA
LOC100039851	100039851	0	0	0	0	0.36	0.1	0.44	0.29	-0.45639	0.732599	-0.666263
LOC100039852	100039852	0	0	0	0	0	0	0	0	NA	NA	NA
LOC100039853	100039853	0	0	0	0	0	0	0	0	NA	NA	NA
LOC100039854	100039854	0	0	0	0	0	0	0	0	NA	NA	NA
LOC100039855	100039855	0	0	0	0	0	0	0	0	NA	NA	NA
LOC100039857	100039857	0	0	0	0	0	0	0	0	NA	NA	NA
LOC100039858	100039858	0	0	0	0	0	0	0	0	NA	NA	NA
LOC100039859	100039859	0	0	0	0	0	0.1	0.09	0	0	0	0
LOC100039860	100039860	0	0	0	0	0.01	0.01	0	0.01	0	0	0
LOC100039861	100039861	0	0	0	0	0	0	0.03	0	NA	NA	NA
LOC100039862	100039862	0.07	0.07	0.03	0.03	0.18	0.17	0.09	0.12	0.337624	0.414586	0.292782
LOC100039863	100039863	0	0	0	0	0	0	0	0	NA	NA	NA
LOC100039864	100039864	7	7	9.82	7.93	7.54	6.55	12.03	10.27	-0.497801	0.227285	-0.511746
LOC100039865	100039865	0	0	0	0	0	0	0	0	NA	NA	NA
LOC100039866	100039866	0	0	0	0	0	0	0	0	NA	NA	NA
LOC100039867	100039867	0	0	0	0	0	0	0	0	NA	NA	NA
LOC100039869	100039869	0	0	0	0	0.01	0.02	0.01	0	0	0	0
LOC100039870	100039870	0.91	0.4	0.41	0.3	4.05	2.51	2.94	2.5	0.508286	0.474507	0.355777
LOC100039871	100039871	0	0	0	0	0	0	0	0.21	NA	NA	NA
LOC100039872	100039872	0	0	0	0	0	0	0	0	NA	NA	NA
LOC100039874	100039874	0	0	0	0	0	0	0	0	NA	NA	NA
LOC100039875	100039875	1.53	0.73	1.14	0.94	2.42	1.56	2.07	1.76	0.0277701	0.361131	0.0783879
LOC100039876	100039876	0	0	0	0	0	0	0	0	NA	NA	NA
LOC100039877	100039877	0	0	0	0	0	0	0	0	NA	NA	NA
LOC100039878	100039878	0	0	0	0	0	0	0	0	NA	NA	NA
LOC100039879	100039879	0	0	0	0	0	0	0	0	NA	NA	NA
LOC100039880	100039880	0	0	0	0	0.25	0	0	0	NA	NA	NA
LOC100039881	100039881	0	0	0	0	0	0	0	0	NA	NA	NA
LOC100039882	100039882	0.39	0.52	0.47	0.17	0.55	0.86	0.47	0.43	0.64264	0.831391	0.591194
LOC100039883	100039883	57.88	55.81	38.72	41.19	57.46	56.3	40.52	40.21	0.50193	0.05894	0.501718
LOC100039884	100039884	0	0	0.01	0	0	0	0	0	NA	NA	NA
LOC100039885	100039885	0	0	0	0	0	0	0	0	NA	NA	NA
LOC100039886	100039886	0	0	0	0	0	0	0	0	NA	NA	NA
LOC100039887	100039887	0.25	0.28	0.52	0.29	0	0.29	0.64	0.43	-1.08839	1.1366	-1.19704
LOC100039888	100039888	40.74	40.39	26.86	24.85	427.37	419.32	285.72	277.08	0.620093	0.0544904	0.594408
LOC100039889	100039889	0	0	0	0	0	0	0	0	NA	NA	NA
LOC100039890	100039890	0	0	0	0	0	0	0	0	NA	NA	NA
LOC100039891	100039891	0	0	0	0	0	0	0	0	NA	NA	NA
LOC100039892	100039892	0	0.07	0	0	0.02	0	0	0	NA	NA	NA
LOC100039893	100039893	0	0	0	0	0.02	0	0	0.02	0	0	0
LOC100039894	100039894	0	0	0	0	0	0	0	0	NA	NA	NA
LOC100039895	100039895	0.07	0.07	0	0.07	0	0	0	0.13	-0.0946279	0.189256	0
LOC100039896	100039896	0	0	0	0	0	0	0	0	NA	NA	NA
LOC100039897	100039897	0	0	0	0	0	0	0	0	NA	NA	NA
LOC100039898	100039898	0	0	0	0	0	0	0	0	NA	NA	NA
LOC100039899	100039899	0	0	0	0	0	0	0	0	NA	NA	NA
LOC100039900	100039900	0.8	0.88	0.37	0.48	0.86	1.29	0.43	0.67	0.98302	0.100441	0.97387
LOC100039901	100039901	0	0	0	0	0	0	0	0	NA	NA	NA
LOC100039902	100039902	0	0.21	0	0.2	0.18	0.21	0	0.4	-0.00280611	0.727598	0
LOC100039903	100039903	0	0	0	0	0	0	0	0	NA	NA	NA
LOC100039904	100039904	0	0	0	0	0	0	0	0	NA	NA	NA
LOC100039905	100039905	0	0	0	0	0	0	0	0	NA	NA	NA
LOC100039906	100039906	0	0	0	0	0	0	0	0	NA	NA	NA
LOC100039907	100039907	0	0	0	0	0	0	0	0	NA	NA	NA
LOC100039908	100039908	0	0	0	0	0.02	0.03	0.02	0.03	0	0	0
LOC100039909	100039909	0	0	0	0	0	0	0	0	NA	NA	NA
LOC100039910	100039910	0	0	0	0	0	0	0	0	NA	NA	NA
LOC100039911	100039911	0	0	0	0	0	0	0	0	NA	NA	NA
LOC100039913	100039913	0	0	0	0	0	0	0	0	NA	NA	NA
LOC100039914	100039914	0	0	0	0	0	0	0	0	NA	NA	NA
LOC100039915	100039915	0.98	0.59	0.75	1.07	0.97	0.48	0.54	1.19	-0.234441	1.01594	-0.23327
LOC100039916	100039916	0	0	0	0	0	0	0	0	NA	NA	NA
LOC100039917	100039917	0.73	0.54	1.61	0.89	7.38	10.1	16.71	14.1	-0.880574	0.33756	-0.829065
LOC100039918	100039918	0	0	0	0	0	0	0	0	NA	NA	NA
LOC100039919	100039919	0	0	0	0	0	0	0	0	NA	NA	NA
LOC100039920	100039920	0	0	0	0	0	0	0.16	0	NA	NA	NA
LOC100039921	100039921	0	0	0	0	0	0	0	0	NA	NA	NA
LOC100039922	100039922	0	0	0	0	0	0	0	0	NA	NA	NA
LOC100039923	100039923	0	0	0	0	0	0	0	0	NA	NA	NA
LOC100039924	100039924	1.92	1.66	3.41	2.84	157.02	147.68	320.06	314.49	-0.930327	0.152362	-1.05563
LOC100039925	100039925	0.08	0	0.08	0	0.96	0.88	1.12	1.06	-0.12272	0.142949	-0.235216
LOC100039926	100039926	0	0	0	0	0	0	0	0	NA	NA	NA
LOC100039927	100039927	0	0	0	0	0	0	0	0	NA	NA	NA
LOC100039928	100039928	0.87	0.58	0.17	0.58	1.4	0.77	1.22	0.58	0.740708	1.08938	0.505492
LOC100039929	100039929	0	0	0	0	0	0	0	0	NA	NA	NA
LOC100039930	100039930	0	0	0	0	0	0	0	0	NA	NA	NA
LOC100039931	100039931	0	0	0.06	0	0	0.13	0.06	0	0.0946279	0.189256	0
LOC100039932	100039932	0	0	0	0	0	0	0	0	NA	NA	NA
LOC100039933	100039933	0	0	0	0	0	0	0	0	NA	NA	NA
LOC100039934	100039934	0	0	0	0	0	0	0	0	NA	NA	NA
LOC100039935	100039935	0	0	0	0	0	0	0	0	NA	NA	NA
LOC100039936	100039936	0	0	0	0	0	0	0	0	NA	NA	NA
LOC100039937	100039937	0	0	0	0	0	0	0	0	NA	NA	NA
LOC100039938	100039938	0	0	0	0	0	0	0.01	0	NA	NA	NA
LOC100039939	100039939	0	0	0	0	0	0	0	0	NA	NA	NA
LOC100039940	100039940	3.48	4.32	2.16	2.01	338.33	373.85	217.97	227.37	0.785903	0.214731	0.679604
LOC100039941	100039941	0	0	0	0	0	0.01	0.01	0	0	0	0
LOC100039942	100039942	0	0	0	0	0.17	0.37	0.17	0.19	0.240381	0.480763	0.432959
LOC100039943	100039943	0.01	0.02	0.02	0.01	0.14	0.11	0.07	0.11	0.121357	0.242713	0
LOC100039944	100039944	0	0	0	0	0	0	0	0	NA	NA	NA
LOC100039945	100039945	2.16	2.17	1.6	1.33	98.44	106.58	81.69	76.67	0.470879	0.180357	0.37626
LOC100039946	100039946	0	0	0	0	0	0	0	0	NA	NA	NA
LOC100039948	100039948	0	0	0	0	0	0	0	0	NA	NA	NA
LOC100039949	100039949	0	0	0	0	0	0	0	0.03	NA	NA	NA
LOC100039950	100039950	2.15	2.96	2.22	2.82	2.19	3	2.26	3.04	-0.0102054	0.054869	-0.00559185
LOC100039951	100039951	0	0	0	0	0.04	0.03	0.01	0.03	0	0	0
LOC100039952	100039952	0	0	0	0	0	0	0	0	NA	NA	NA
LOC100039953	100039953	0.05	0.11	0.05	0.1	0	0.05	0.05	0.21	-0.233221	0.561863	-0.0356239
LOC100039954	100039954	0	0	0	0	0	0	0	0	NA	NA	NA
LOC100039955	100039955	0	0	0	0	0.01	0.01	0.01	0.01	0	0	0
LOC100039956	100039956	0	0	0	0	0	0	0	0	NA	NA	NA
LOC100039957	100039957	0	0.07	0.07	0	0.42	0.16	0.35	0.24	-0.080482	0.35845	-0.0220263
LOC100039958	100039958	0	0	0	0.09	1.19	1	2.21	1.9	-0.454771	0.525296	-0.939458
LOC100039959	100039959	0.01	0.01	0.01	0.01	0.06	0.05	0.05	0.03	0	0	0
LOC100039960	100039960	0	0	0	0	0	0	0	0	NA	NA	NA
LOC100039961	100039961	0	0	0	0	0	0	0.01	0.01	NA	NA	NA
LOC100039963	100039963	0	0	0	0	0	0	0	0	NA	NA	NA
LOC100039964	100039964	0	0	0.1	0	0	0	0.15	0	NA	NA	NA
LOC100039965	100039965	0	0	0.01	0	0.02	0.01	0.02	0.01	0	0	0
LOC100039966	100039966	0	0	0	0	0	0	0	0	NA	NA	NA
LOC100039967	100039967	0.23	0	0.18	0.1	0.59	0.4	0.77	0.9	-0.300108	0.653476	-0.676593
LOC100039968	100039968	3.3	4.41	2.74	2.29	3.55	3.96	2.37	2.3	0.64513	0.291722	0.649912
LOC100039969	100039969	0	0	0	0	0	0	0	0	NA	NA	NA
LOC100039970	100039970	0	0	0	0	0	0	0	0	NA	NA	NA
LOC100039971	100039971	0	0	0	0	0	0	0	0	NA	NA	NA
LOC100039972	100039972	0	0	0	0	0	0	0.17	0	NA	NA	NA
LOC100039973	100039973	0	0	0	0	0	0	0	0	NA	NA	NA
LOC100039974	100039974	0	0	0	0	0	0	0	0	NA	NA	NA
LOC100039975	100039975	0.38	0.18	0.25	0.27	0.35	0.37	0.27	0.19	0.338758	0.661503	0.38529
LOC100039976	100039976	0	0	0	0	0.01	0.01	0	0.01	0	0	0
LOC100039977	100039977	0	0	0	0	0	0	0	0	NA	NA	NA
LOC100039978	100039978	0.17	0.09	0	0.1	2.98	1.98	3.48	2.82	0.00789126	0.546555	-0.294022
LOC100039979	100039979	0.63	1.05	1.49	1.56	36.73	34.74	61.13	47.6	-0.750583	0.347163	-0.611732
LOC100039980	100039980	0	0	0	0	0	0	0	0	NA	NA	NA
LOC100039981	100039981	0	0	0	0	0	0	0	0	NA	NA	NA
LOC100039982	100039982	2.8	3.76	2.27	2.85	2.49	4.46	1.86	2.28	0.52284	0.301204	0.544944
LOC100039983	100039983	0.52	0.57	0.93	0.84	1.18	1.16	1.5	1.59	-0.549806	0.211373	-0.502748
LOC100039984	100039984	0	0	0	0	0.09	0.06	0.04	0.03	0	0	0
LOC100039985	100039985	0	0	0	0	0	0	0	0	NA	NA	NA
LOC100039986	100039986	0	0	0	0	0	0	0	0	NA	NA	NA
LOC100039987	100039987	0	0	0	0	0	0	0	0	NA	NA	NA
LOC100039988	100039988	0.14	0.23	0.14	0.23	34.5	30.99	35.01	37.41	-0.073198	0.132658	-0.144338
LOC100039989	100039989	0	0	0	0	0	0.03	0	0.03	0	0	0
LOC100039990	100039990	0	0	0	0	0	0	0	0	NA	NA	NA
LOC100039991	100039991	0	0	0	0	0	0	0	0	NA	NA	NA
LOC100039992	100039992	0	0	0	0	0.01	0.01	0	0	NA	NA	NA
LOC100039993	100039993	0	0.01	0	0.01	0.03	0.03	0.02	0.03	0	0	0
LOC100039994	100039994	0.14	0.07	0.07	0	22.71	21.17	15.35	15.36	0.37834	0.256011	0.518458
LOC100039995	100039995	0	0	0	0	0	0	0	0	NA	NA	NA
LOC100039996	100039996	0	0	0	0	0	0	0	0	NA	NA	NA
LOC100039997	100039997	4.52	5.49	2.82	3.34	4.39	5.58	3.02	3.41	0.661938	0.0830321	0.666278
LOC100039998	100039998	0	0	0	0	0	0	0	0	NA	NA	NA
LOC100039999	100039999	0	0	0	0	0	0	0	0	NA	NA	NA
LOC100040000	100040000	0.03	0	0.07	0	0.03	0	0.1	0.04	0	0	0
LOC100040001	100040001	1.08	1.02	0.81	0.44	3.67	2.78	2.69	2.16	0.610065	0.403439	0.487115
LOC100040002	100040002	0	0	0	0	0	0	0	0	NA	NA	NA
LOC100040003	100040003	0	0	0	0	0	0	0	0	NA	NA	NA
LOC100040004	100040004	0	0	0	0	0	0	0.01	0	NA	NA	NA
LOC100040005	100040005	0	0.02	0	0	0.05	0.01	0.03	0.02	0	0	0
LOC100040006	100040006	0.13	0	0	0	0.13	0	0	0.29	-0.194757	0.911826	0
LOC100040007	100040007	0.01	0.02	0.02	0.02	0	0.04	0.01	0	0	0	0
LOC100040008	100040008	0	0	0	0	0.02	0.01	0.01	0.01	0	0	0
LOC100040009	100040009	0	0.01	0	0	0.01	0.01	0	0.01	0	0	0
LOC100040010	100040010	0	0	0	0	0	0	0	0	NA	NA	NA
LOC100040011	100040011	0	0	0	0.01	0.01	0.03	0.01	0	0	0	0
LOC100040012	100040012	0	0	0	0	0	0	0	0	NA	NA	NA
LOC100040013	100040013	0	0	0	0	0	0	0	0	NA	NA	NA
LOC100040014	100040014	0.56	0.35	1.03	0.79	0.4	0.44	1.27	0.7	-1.09756	0.432259	-1.11484
LOC100040016	100040016	0	0	0	0	0	0	0	0	NA	NA	NA
LOC100040017	100040017	0	0	0	0	0	0	0	0	NA	NA	NA
LOC100040018	100040018	29.54	31.66	19.2	18.01	68.13	77.29	46.7	45.69	0.684674	0.123362	0.672914
LOC100040019	100040019	0	0	0	0	0	0	0	0	NA	NA	NA
LOC100040020	100040020	0	0	0	0	0	0	0	0	NA	NA	NA
LOC100040021	100040021	2.59	1.92	4.9	4.26	165.55	151.49	299.33	266.37	-0.934564	0.149912	-0.838168
LOC100040022	100040022	0	0	0	0	0	0	0	0	NA	NA	NA
LOC100040023	100040023	0.02	0	0	0	0.15	0.11	0.03	0.09	0.180617	0.277248	0
LOC100040024	100040024	0	0	0	0	0.28	0.31	0	0.31	0.371357	0.742713	0.560715
LOC100040025	100040025	0	0	0	0	0	0	0	0	NA	NA	NA
LOC100040026	100040026	0	0	0	0	0	0	0	0	NA	NA	NA
LOC100040027	100040027	0	0	0	0	0.05	0	0.09	0	0	0	0
LOC100040029	100040029	0	0	0	0	17.13	18.67	20.54	19.6	-0.0830107	0.123764	-0.165081
LOC100040030	100040030	0	0	0	0	0	0	0	0	NA	NA	NA
LOC100040031	100040031	0	0	0	0	0	0	0	0	NA	NA	NA
LOC100040032	100040032	0.01	0.01	0.01	0	0.01	0.02	0.01	0.01	0	0	0
LOC100040033	100040033	0	0	0	0	0	0	0	0	NA	NA	NA
LOC100040034	100040034	0	0	0	0	0	0	0	0.02	NA	NA	NA
LOC100040035	100040035	0	0	0	0	0	0	0	0	NA	NA	NA
LOC100040036	100040036	0	0	0	0	0	0	0	0	NA	NA	NA
LOC100040037	100040037	0.02	0	0	0	0.02	0	0	0	NA	NA	NA
LOC100040038	100040038	0	0	0	0	0	0.03	0.02	0.03	0	0	0
LOC100040039	100040039	0	0	0	0	0	0	0	0	NA	NA	NA
LOC100040040	100040040	0	0	0	0	0	0	0	0	NA	NA	NA
LOC100040041	100040041	0.05	0.05	0.03	0.02	0.06	0.08	0.03	0.02	0	0	0
LOC100040043	100040043	0	0	0	0	0	0	0	0	NA	NA	NA
LOC100040044	100040044	0	0	0	0	0	0	0	0	NA	NA	NA
LOC100040045	100040045	0	0	0	0	0	0	0	0	NA	NA	NA
LOC100040046	100040046	0.12	0.05	0.11	0.1	0.13	0.13	0.13	0.13	0.0313827	0.0627654	-0.128324
LOC100040047	100040047	0.06	0	0	0	0.45	0.56	0.9	0.62	-0.28671	0.480538	-0.506461
LOC100040048	100040048	0	0	0	0	0	0	0	0	NA	NA	NA
LOC100040049	100040049	0	0	0	0	0	0	0	0	NA	NA	NA
LOC100040050	100040050	0	0	0	0	0	0	0	0	NA	NA	NA
LOC100040051	100040051	0	0	0	0	0	0	0	0	NA	NA	NA
LOC100040052	100040052	1.66	0.73	1.59	1.46	9.71	7.85	9.19	8.56	-0.245839	0.511216	-0.0601948
LOC100040053	100040053	0	0	0	0	0.63	0.5	0.63	0.77	-0.155733	0.311465	-0.309104
LOC100040054	100040054	0	0	0	0	0	0	0	0	NA	NA	NA
LOC100040055	100040055	0	0	0	0	0	0	0	0	NA	NA	NA
LOC100040056	100040056	0	0	0	0	0	0.1	0	0.1	0	0	0
LOC100040057	100040057	0	0	0	0	0	0	0.07	0.08	NA	NA	NA
LOC100040058	100040058	3.63	3.75	10.56	11.21	3.46	3.62	10.22	10.67	-1.56061	0.0160815	-1.56082
LOC100040059	100040059	0	0	0	0	0.04	0	0.01	0	0	0	0
LOC100040061	100040061	0.16	0.12	0.17	0	0.06	0.12	0.17	0.06	-0.0817322	0.484887	0.201634
LOC100040062	100040062	0	0	0	0	0	0	0	0	NA	NA	NA
LOC100040063	100040063	0.48	0.44	0.29	0.28	0.58	0.51	0.29	0.37	0.710508	0.222685	0.708537
LOC100040064	100040064	0	0	0	0	0	0	0	0	NA	NA	NA
LOC100040065	100040065	0	0	0	0	0	0	0	0	NA	NA	NA
LOC100040066	100040066	0.84	0.61	0.83	1.83	53.11	72.35	123.93	88.99	-0.772201	0.755171	-0.764418
LOC100040067	100040067	0	0	0	0	0	0	0	0	NA	NA	NA
LOC100040068	100040068	0	0	0	0	0	0	0	0	NA	NA	NA
LOC100040069	100040069	6.62	5.38	6.98	6.73	6.67	5.56	7.13	7.07	-0.210559	0.144027	-0.203988
LOC100040070	100040070	0	0	0	0	0	0	0	0	NA	NA	NA
LOC100040071	100040071	0	0	0	0	0	0	0	0	NA	NA	NA
LOC100040072	100040072	0	0	0	0	0	0	0	0	NA	NA	NA
LOC100040073	100040073	0	0	0	0.13	0.25	0.14	0.25	0.14	-0.0946279	0.189256	-0.378512
LOC100040074	100040074	0	0	0	0	0.02	0.02	0	0	NA	NA	NA
LOC100040075	100040075	0	0	0	0	0	0	0	0	NA	NA	NA
LOC100040076	100040076	0	0	0	0	0	0	0	0	NA	NA	NA
LOC100040077	100040077	0	0	0	0	0	0	0	0	NA	NA	NA
LOC100040078	100040078	0	0	0	0	0	0	0	0	NA	NA	NA
LOC100040079	100040079	0	0	0	0	3.63	3.2	2.68	2.96	0.137553	0.207027	0.27619
LOC100040080	100040080	0	0	0	0	0	0	0	0	NA	NA	NA
LOC100040081	100040081	0	0	0	0	0	0	0	0	NA	NA	NA
LOC100040083	100040083	0	0	0	0	0	0	0	0	NA	NA	NA
LOC100040084	100040084	0	0	0	0	0	0	0	0	NA	NA	NA
LOC100040085	100040085	0	0	0	0	0	0	0	0	NA	NA	NA
LOC100040086	100040086	0	0.03	0.07	0.02	0.07	0.05	0.06	0.03	0	0	0
LOC100040087	100040087	0	0	0	0	0.01	0	0.01	0.01	0	0	0
LOC100040088	100040088	0.09	0.02	0.05	0.1	0.05	0.05	0.11	0.05	-0.0343759	0.0687518	0
LOC100040089	100040089	0	0	0	0	0.07	0	0.07	0	0	0	0
LOC100040090	100040090	0	0	0	0	0.06	0	0	0	NA	NA	NA
LOC100040092	100040092	0.15	0.08	0.19	0.04	1.73	1.54	1.43	1.32	0.0390281	0.279978	0.232043
LOC100040093	100040093	0	0	0	0	0	0	0	0	NA	NA	NA
LOC100040094	100040094	0	0	0	0	0	0	0	0	NA	NA	NA
LOC100040095	100040095	0	0	0	0	0	0	0	0	NA	NA	NA
LOC100040096	100040096	0	0	0	0	0	0	0	0	NA	NA	NA
LOC100040097	100040097	0	0	0	0	0	0	0	0.5	NA	NA	NA
LOC100040098	100040098	0	0	0	0	0	0	0	0	NA	NA	NA
LOC100040099	100040099	3.24	2.83	1.88	2.08	7.84	9.68	7.66	6.24	0.474112	0.325182	0.401443
LOC100040100	100040100	0	0	0	0	0	0	0	0	NA	NA	NA
LOC100040101	100040101	0	0	0	0	0	0	0	0	NA	NA	NA
LOC100040102	100040102	0	0	0	0	0	0	0	0	NA	NA	NA
LOC100040103	100040103	0	0	0	0	0.01	0.01	0.01	0.01	0	0	0
LOC100040104	100040104	0	0	0	0	0	0	0	0	NA	NA	NA
LOC100040105	100040105	0	0	0.06	0	0.12	0	0.06	0.07	0.0657586	0.131517	0
LOC100040106	100040106	0	0	0	0	0	0	0	0	NA	NA	NA
LOC100040107	100040107	0	0	0	0	0.01	0	0	0	NA	NA	NA
LOC100040108	100040108	0	0	0	0	0.02	0	0.02	0	0	0	0
LOC100040109	100040109	0	0	0	0	0	0	0.02	0.02	NA	NA	NA
LOC100040110	100040110	0	0.13	0.48	0.67	1.1	0.41	1.34	0.94	-1.52761	0.982716	-1.06451
LOC100040112	100040112	0	0	0	0	0	0	0	0	NA	NA	NA
LOC100040113	100040113	0.53	0.38	0.38	0.21	0.42	0.76	0.57	0.42	0.43766	0.611678	0.403578
LOC100040114	100040114	0	0	0	0	0	0	0	0	NA	NA	NA
LOC100040115	100040115	0	0	0	0	0	0	0	0	NA	NA	NA
LOC100040116	100040116	0	0	0	0	0	0	0	0	NA	NA	NA
LOC100040117	100040117	0	0	0	0	12.22	13.86	14	17.14	-0.125656	0.151916	-0.255825
LOC100040118	100040118	0	0	0	0	0	0	0	0	NA	NA	NA
LOC100040119	100040119	0.01	0.01	0.01	0.01	0.03	0.04	0.02	0.02	0	0	0
LOC100040120	100040120	0	0	0	0	0	0	0	0	NA	NA	NA
LOC100040121	100040121	0	0	0	0	0	0	0	0	NA	NA	NA
LOC100040122	100040122	0	0	0	0	0	0	0	0	NA	NA	NA
LOC100040123	100040123	0.51	0.78	0.91	1.22	30.82	43.59	90.47	85.86	-1.00307	0.391484	-1.23724
LOC100040125	100040125	0	0	0	0	0	0	0	0	NA	NA	NA
LOC100040126	100040126	0	0	0	0	0.01	0.01	0.01	0.01	0	0	0
LOC100040127	100040127	0	0	0	0	0.02	0.02	0.02	0.03	0	0	0
LOC100040128	100040128	6.43	5.93	2.91	3.49	29.36	26.49	15.19	16.5	0.885579	0.205389	0.840571
LOC100040129	100040129	0	0.11	0.1	0	6.72	6.77	5.52	5.04	0.211757	0.183784	0.351399
LOC100040130	100040130	0	0	0	0	0	0	0	0	NA	NA	NA
LOC100040131	100040131	0.01	0	0.01	0.01	0.05	0.04	0.07	0.06	0	0	0
LOC100040132	100040132	0	0	0	0	0.01	0.01	0.01	0.01	0	0	0
LOC100040133	100040133	0	0	0	0	0.64	0.8	1.04	0.97	-0.244606	0.330939	-0.481127
LOC100040134	100040134	0	0	0	0	0	0	0	0	NA	NA	NA
LOC100040135	100040135	0	0	0	0	0.14	0.12	0.07	0.08	0.187115	0.234363	0
LOC100040136	100040136	0	0	0	0	0.02	0.08	0.02	0.1	0	0	0
LOC100040137	100040137	0	0	0	0	0	0	0	0	NA	NA	NA
LOC100040138	100040138	0	0	0	0	0	0	0	0	NA	NA	NA
LOC100040139	100040139	0.1	0.12	0	0	0.2	0.23	0.3	0.11	0.185551	0.684599	0.664816
LOC100040140	100040140	0	0	0	0	0.37	0.41	0.46	0.45	-0.112102	0.14881	-0.222392
LOC100040141	100040141	0.65	0.35	0.33	0.36	1.63	1.26	3.4	1.97	-0.192026	0.885311	-0.639548
LOC100040142	100040142	0	0	0	0	0	0	0	0	NA	NA	NA
LOC100040143	100040143	0	0	0	0	0	0	0	0	NA	NA	NA
LOC100040144	100040144	0	0	0	0	0.07	0	0	0	NA	NA	NA
LOC100040145	100040145	0	0	0.13	0.13	0.13	0	0.13	0.28	-0.560613	0.641844	-0.744161
LOC100040146	100040146	0	0	0	0	0	0	0	0	NA	NA	NA
LOC100040147	100040147	0	0	0	0	0	0	0	0	NA	NA	NA
LOC100040148	100040148	0	0	0.02	0	0.02	0.02	0.11	0.07	-0.0343759	0.0687518	0
LOC100040149	100040149	0	0	0	0	0	0	0	0	NA	NA	NA
LOC100040150	100040150	0.14	0.1	0.28	0.25	0.19	0.05	0.23	0.15	-0.795631	0.459541	-0.922832
LOC100040151	100040151	2.07	2.21	0.19	0.21	2.01	1.66	0.19	0.07	3.57435	0.319935	3.59042
LOC100040152	100040152	0	0	0	0	0	0	0	0	NA	NA	NA
LOC100040153	100040153	0	0	0	0	0.01	0	0	0	NA	NA	NA
LOC100040154	100040154	0	0	0	0	0	0	0	0	NA	NA	NA
LOC100040155	100040155	0	0	0	0	0	0	0	0	NA	NA	NA
LOC100040156	100040156	0	0	0	0	0	0	0	0	NA	NA	NA
LOC100040157	100040157	0	0	0	0	0	0	0	0	NA	NA	NA
LOC100040158	100040158	0	0	0	0	0	0	0	0	NA	NA	NA
LOC100040159	100040159	0	0	0	0	0	0	0	0	NA	NA	NA
LOC100040160	100040160	0	0	0	0	0	0	0	0	NA	NA	NA
LOC100040161	100040161	0	0	0	0	0.01	0	0	0	NA	NA	NA
LOC100040162	100040162	0	0	0	0	0	0	0	0	NA	NA	NA
LOC100040163	100040163	0	0	0	0	0.01	0.01	0.01	0.01	0	0	0
LOC100040164	100040164	0	0	0.11	0	0	0.12	0	0	0.0313827	0.167486	0
LOC100040165	100040165	0	0	0	0	0	0	0.02	0	NA	NA	NA
LOC100040166	100040166	0	0	0	0	0	0	0	0	NA	NA	NA
LOC100040167	100040167	0	0	0	0	0.29	0.16	0.15	0.48	-0.158468	1.05138	-0.485427
LOC100040169	100040169	0	0	0.09	0.1	4.05	4.55	6.46	7.14	-0.330917	0.382232	-0.681214
LOC100040171	100040171	0	0	0	0	0	0	0	0	NA	NA	NA
LOC100040172	100040172	0	0	0	0	0	0	0	0	NA	NA	NA
LOC100040173	100040173	0.16	0.34	0.15	0.17	1.98	2.35	3.79	3.19	-0.0711209	0.828699	-0.595873
LOC100040174	100040174	1.45	2.17	0.62	1.25	1.97	1.94	0.51	1.02	1.22465	0.5157	1.14712
LOC100040175	100040175	0	0	0	0	0	0	0	0	NA	NA	NA
LOC100040176	100040176	0.34	0	0	0.1	0.69	0.86	0.86	0.86	0.361949	0.947636	0.0544478
LOC100040177	100040177	0.04	0.04	0.12	0.13	7.2	6.6	10.23	7.74	-0.344538	0.125506	-0.392515
LOC100040178	100040178	0	0	0	0	0	0	0	0	NA	NA	NA
LOC100040179	100040179	0	0	0	0	0	0	0	0	NA	NA	NA
LOC100040180	100040180	0	0	0	0	0.06	0	0.06	0	0	0	0
LOC100040181	100040181	0	0	0	0	0	0	0	0	NA	NA	NA
LOC100040182	100040182	0.1	0.12	0.3	0.22	6.78	9.15	13.38	13.91	-1.01111	0.41409	-0.78407
LOC100040183	100040183	0	0	0	0	0	0	0.08	0	NA	NA	NA
LOC100040184	100040184	0	0	0	0	0	0.1	0	0	NA	NA	NA
LOC100040185	100040185	0	0	0	0	0.12	0.04	0.08	0.04	0.0657586	0.131517	0
LOC100040186	100040186	0	0	0	0	0.23	0.17	0.3	0.59	-0.544627	0.853061	-1.15381
LOC100040187	100040187	0	0	0	0	0	0	0	0	NA	NA	NA
LOC100040188	100040188	0	0	0	0	0	0	0	0	NA	NA	NA
LOC100040189	100040189	0	0	0	0	0	0.03	0.02	0.03	0	0	0
LOC100040190	100040190	0.14	0.11	0.28	0.13	0.74	0.79	1.64	1.23	-0.75696	0.405069	-0.881819
LOC100040191	100040191	0	0	0	0	0	0	0	0	NA	NA	NA
LOC100040192	100040192	0	0	0	0	0	0	0	0	NA	NA	NA
LOC100040193	100040193	0	0	0	0	0	0	0	0	NA	NA	NA
LOC100040194	100040194	0.02	0.02	0	0	0.09	0.05	0.06	0.08	0	0	0
LOC100040195	100040195	0	0	0	0	0	0	0	0	NA	NA	NA
LOC100040196	100040196	0	0	0	0	0	0	0	0	NA	NA	NA
LOC100040197	100040197	0	0	0	0	0	0	0	0	NA	NA	NA
LOC100040198	100040198	0	0	0	0	0	0	0.1	0.11	NA	NA	NA
LOC100040199	100040199	0	0	0	0	0	0	0	0.24	NA	NA	NA
LOC100040200	100040200	0.05	0	0.05	0	0.6	0.41	0.83	0.71	-0.315086	0.387135	-0.584963
LOC100040201	100040201	0	0	0	0	0	0	0	0	NA	NA	NA
LOC100040202	100040202	0	0	0	0	0	0	0.03	0	NA	NA	NA
LOC100040203	100040203	0	0	0	0	0	0	0	0	NA	NA	NA
LOC100040204	100040204	0	0	0	0	0	0.15	0	0	NA	NA	NA
LOC100040205	100040205	0	0	0	0	0	0	0.04	0.05	NA	NA	NA
LOC100040206	100040206	0	0	0	0	0	0	0	0	NA	NA	NA
LOC100040207	100040207	1.08	0.73	0.12	0.33	0.91	0.93	0.18	0.4	1.96761	0.969828	1.82525
LOC100040208	100040208	0	0	0	0	0	0	0	0	NA	NA	NA
LOC100040209	100040209	0.02	0.02	0.02	0	0.01	0.02	0.01	0	0	0	0
LOC100040210	100040210	0	0	0	0	0	0	0	0	NA	NA	NA
LOC100040211	100040211	0	0.17	0.08	0	0	0.08	0	0.17	0	0.625057	0
LOC100040212	100040212	0.45	0.33	0.6	0.49	1.35	1	0.9	0.5	0.149902	0.763722	0.330017
LOC100040213	100040213	0	0	0	0	0	0	0	0	NA	NA	NA
LOC100040214	100040214	0	0	0	0	0	0	0	0	NA	NA	NA
LOC100040215	100040215	0	0	0	0	0.13	0	0	0	NA	NA	NA
LOC100040216	100040216	0	0	0	0	0	0	0	0	NA	NA	NA
LOC100040217	100040217	0	0.01	0	0	0.02	0.02	0.03	0.02	0	0	0
LOC100040218	100040218	0	0	0	0	0	0.02	0	0	NA	NA	NA
LOC100040219	100040219	0	0	0	0	10.32	11.28	12.72	13.75	-0.14683	0.16967	-0.293327
LOC100040220	100040220	5.3	4.66	9.71	8.83	31.74	30.06	51.91	49.01	-0.802626	0.111668	-0.735276
LOC100040221	100040221	0	0	0.25	0	0.13	0	0.13	0.14	-0.451839	0.623565	-0.378512
LOC100040223	100040223	0	0	0	0	0	0	0	0	NA	NA	NA
LOC100040224	100040224	0	0	0	0	0	0	0	0	NA	NA	NA
LOC100040225	100040225	0	0	0	0	0	0	0	0	NA	NA	NA
LOC100040226	100040226	0.02	0.02	0.02	0.02	0.06	0.06	0.05	0.03	0	0	0
LOC100040227	100040227	0.07	0.08	0.08	0.07	0.1	0.13	0.14	0.14	-0.148086	0.230473	-0.104337
LOC100040228	100040228	0.03	0	0.02	0.03	0	0.03	0.02	0.03	0	0	0
LOC100040229	100040229	0.07	0	0	0.07	0.07	0	0	0.07	0	0	0
LOC100040230	100040230	0.14	0.11	0.22	0.21	0.25	0.31	0.24	0.26	-0.318078	0.565286	-0.199309
LOC100040231	100040231	0	0	0	0	0	0	0	0	NA	NA	NA
LOC100040232	100040232	2.34	2.71	1.61	2.05	9.97	11.65	9.02	11.03	0.29137	0.21653	0.169722
LOC100040233	100040233	0	0	0	0	0	0	0	0	NA	NA	NA
LOC100040234	100040234	0	0	0.04	0.07	1.84	1.84	1.49	1.44	0.164508	0.191018	0.275634
LOC100040235	100040235	0	0	0	0	0	0	0	0	NA	NA	NA
LOC100040236	100040236	0	0	0	0	0	0	0	0	NA	NA	NA
LOC100040237	100040237	0	0	0.01	0.01	0.04	0.01	0.04	0.01	0	0	0
LOC100040238	100040238	0	0	0	0	0	0	0	0	NA	NA	NA
LOC100040239	100040239	0	0	0	0	0.38	0.29	0.34	0.33	-0.00648711	0.14181	0
LOC100040240	100040240	0	0	0	0	0	0	0	0	NA	NA	NA
LOC100040241	100040241	0	0	0	0	0	0	0	0	NA	NA	NA
LOC100040242	100040242	0.28	0.26	0.28	0.41	0.61	0.41	0.93	0.88	-0.591853	0.452751	-0.680382
LOC100040243	100040243	0.49	0.73	0.64	0.6	0.38	0.61	0.51	0.54	-0.087751	0.369153	-0.0513012
LOC100040244	100040244	0.12	0.15	0.09	0.16	2.13	2.04	2.56	2.97	-0.159315	0.336828	-0.38051
LOC100040245	100040245	0	0	0	0	0	0	0	0	NA	NA	NA
LOC100040247	100040247	0	0	0	0	0	0	0	0	NA	NA	NA
LOC100040248	100040248	0	0	0	0	0	0	0	0	NA	NA	NA
LOC100040249	100040249	0	0	0	0	0	0	0	0	NA	NA	NA
LOC100040250	100040250	0	0	0	0	0.21	0.23	0.63	0.46	-0.646241	0.783496	-1.30875
LOC100040251	100040251	0	0	0	0	0	0	0	0	NA	NA	NA
LOC100040252	100040252	0	0	0	0	0.02	0.03	0.03	0.03	0	0	0
LOC100040253	100040253	0	0	0	0	0	0	0	0	NA	NA	NA
LOC100040254	100040254	0	0	0	0	0	0	0	0	NA	NA	NA
LOC100040255	100040255	0	0	0	0	0	0	0	0	NA	NA	NA
LOC100040256	100040256	0	0	0	0	0	0	0	0	NA	NA	NA
LOC100040257	100040257	0	0	0	0	0	0	0	0	NA	NA	NA
LOC100040258	100040258	0	0	0	0	0.03	0.03	0	0	NA	NA	NA
LOC100040259	100040259	0.68	0.19	0.42	0.65	47.38	35.83	40.87	44.15	-0.291826	1.06887	-0.034083
LOC100040260	100040260	1.46	1.72	2.3	2.4	5.4	5.54	7.13	7.87	-0.510928	0.106433	-0.480456
LOC100040262	100040262	0	0	0	0	0	0	0	0	NA	NA	NA
LOC100040263	100040263	0	0	0	0	0	0	0	0	NA	NA	NA
LOC100040264	100040264	0	0	0	0	0	0	0	0	NA	NA	NA
LOC100040265	100040265	0.02	0.03	0.06	0.02	0.04	0.07	0.11	0.09	-0.0343759	0.0687518	0
LOC100040266	100040266	0	0	0	0	0	0	0	0	NA	NA	NA
LOC100040267	100040267	0	0	0	0	0	0	0	0	NA	NA	NA
LOC100040268	100040268	0	0	0	0	0	0	0	0	NA	NA	NA
LOC100040269	100040269	0	0	0	0	0	0	0	0	NA	NA	NA
LOC100040270	100040270	0	0	0	0	0	0	0	0	NA	NA	NA
LOC100040271	100040271	0.07	0	0	0	1.91	1.05	0.8	0.97	0.342458	0.611076	0.775568
LOC100040272	100040272	0	0	0	0	0	0	0	0	NA	NA	NA
LOC100040273	100040273	0	0	0	0	0	0	0	0	NA	NA	NA
LOC100040274	100040274	0	0	0	0	0	0	0	0	NA	NA	NA
LOC100040275	100040275	0	0	0	0	0	0	0	0	NA	NA	NA
LOC100040276	100040276	0	0	0	0	0	0	0	0	NA	NA	NA
LOC100040277	100040277	0.3	0.11	0.1	0.11	1.01	0.33	0.1	0.33	1.23031	1.59041	1.45121
LOC100040278	100040278	0.13	0.05	0.11	0.05	3.51	3.91	4.76	4.27	-0.0813875	0.283365	-0.274065
LOC100040279	100040279	0	0	0	0	0	0	0	0	NA	NA	NA
LOC100040280	100040280	0	0	0	0	0	0	0	0	NA	NA	NA
LOC100040281	100040281	0	0	0	0	0	0	0	0	NA	NA	NA
LOC100040282	100040282	0	0	0	0	0	0	0	0	NA	NA	NA
LOC100040283	100040283	0	0.13	0	0	0	0.26	0	0	NA	NA	NA
LOC100040284	100040284	0	0	0	0	0.31	0	0.1	0.11	0.373691	0.841551	0
LOC100040285	100040285	0	0	0.01	0.01	0.01	0	0	0	0	0	0
LOC100040286	100040286	0	0	0	0	0	0	0	0	NA	NA	NA
LOC100040287	100040287	10.45	12.54	27.13	28.08	30.38	33.89	71.91	69.19	-1.20304	0.145258	-1.16974
LOC100040288	100040288	0	0	0	0	0	0	0	0	NA	NA	NA
LOC100040289	100040289	0	0	0	0	0	0	0	0	NA	NA	NA
LOC100040290	100040290	0	0	0	0	0	0	0	0	NA	NA	NA
LOC100040291	100040291	0	0	0	0	0	0	0	0.01	NA	NA	NA
LOC100040292	100040292	0	0	0.11	0	0	0	0.23	0.13	NA	NA	NA
LOC100040293	100040293	0	0	0	0	0	0	0	0	NA	NA	NA
LOC100040294	100040294	0	0	0	0	0	0	0	0	NA	NA	NA
LOC100040295	100040295	0	0	0	0	0.02	0	0	0	NA	NA	NA
LOC100040296	100040296	0	0	0	0	0	0	0	0	NA	NA	NA
LOC100040297	100040297	1.36	2.02	1.89	2.09	1.31	2.48	2.07	2.02	-0.222002	0.429722	-0.170596
LOC100040298	100040298	0.05	0	0.1	0	52.3	53.55	51.87	54.09	-0.000641186	0.0107974	-0.00217806
LOC100040299	100040299	0	0	0	0	0	0	0	0	NA	NA	NA
LOC100040300	100040300	3.31	3.83	3.54	3.55	7.21	8.04	7.41	7.01	0.0427285	0.135107	0.057847
LOC100040301	100040301	0	0	0	0	0	0	0	0	NA	NA	NA
LOC100040302	100040302	0	0	0	0	0	0	0.09	0	NA	NA	NA
LOC100040303	100040303	0	0	0	0	0	0	0.01	0	NA	NA	NA
LOC100040304	100040304	0	0	0	0	0	0	0	0	NA	NA	NA
LOC100040305	100040305	0.4	0.18	0.6	0.78	0.57	0.34	0.7	0.88	-1.0922	0.819749	-0.990285
LOC100040306	100040306	0	0	0	0	0	0	0	0	NA	NA	NA
LOC100040307	100040307	0.07	0	0	0	0	0	0	0	NA	NA	NA
LOC100040308	100040308	0	0	0	0	0	0	0	0	NA	NA	NA
LOC100040309	100040309	0	0	0	0	0.02	0.02	0.02	0.03	0	0	0
LOC100040310	100040310	0	0	0	0	0	0.11	0	0	NA	NA	NA
LOC100040311	100040311	0	0	0	0	0.01	0	0.01	0.01	0	0	0
LOC100040312	100040312	0.05	0.05	0.1	0	0	0.05	0.05	0.21	-0.267597	0.535195	0
LOC100040313	100040313	0	0	0	0	0	0	0	0	NA	NA	NA
LOC100040314	100040314	0	0	0	0	0	0	0	0	NA	NA	NA
LOC100040315	100040315	0	0	0	0	0	0	0	0	NA	NA	NA
LOC100040317	100040317	0	0	0	0	0	0	0	0	NA	NA	NA
LOC100040318	100040318	0	0	0	0	0	0	0	0	NA	NA	NA
LOC100040319	100040319	0	0	0	0	0.01	0	0.01	0	0	0	0
LOC100040320	100040320	0.17	0.14	0.09	0.1	2.8	2.53	2.2	2.2	0.45013	0.240085	0.297201
LOC100040321	100040321	0	0	0	0	0	0	0	0.05	NA	NA	NA
LOC100040322	100040322	0.16	0.12	0.1	0.24	0.11	0.06	0.1	0.06	-0.0461061	0.700044	-0.152003
LOC100040323	100040323	0	0	0	0	0	0	0	0	NA	NA	NA
LOC100040324	100040324	0	0	0	0	0	0	0	0	NA	NA	NA
LOC100040325	100040325	0	0	0	0	0	0	0	0	NA	NA	NA
LOC100040326	100040326	0	0	0	0	0.03	0.04	0.06	0.06	0	0	0
LOC100040327	100040327	0	0	0	0	0	0	0	0	NA	NA	NA
LOC100040328	100040328	0	0	0	0	0	0	0	0	NA	NA	NA
LOC100040329	100040329	0	0	0	0	0	0	0	0	NA	NA	NA
LOC100040330	100040330	0	0	0	0	0	0	0	0.1	NA	NA	NA
LOC100040331	100040331	139.64	131.82	213.13	210.95	1037.02	973.9	1504.82	1503.62	-0.613024	0.058354	-0.588729
LOC100040332	100040332	0.15	0.48	0.14	0.32	78.82	103.56	143.79	167.43	-0.218981	0.681399	-0.768143
LOC100040333	100040333	0	0	0	0	0	0	0	0	NA	NA	NA
LOC100040335	100040335	0	0	0	0	0	0	0	0	NA	NA	NA
LOC100040336	100040336	0	0	0	0	0	0	0	0	NA	NA	NA
LOC100040337	100040337	0	0	0	0	0	0	0	0	NA	NA	NA
LOC100040338	100040338	0	0	0	0	0	0	0	0	NA	NA	NA
LOC100040339	100040339	0	0	0	0	0	0	0	0	NA	NA	NA
LOC100040340	100040340	14.02	14.48	22.57	22.62	129.12	128.37	177.81	173.5	-0.556677	0.127068	-0.471356
LOC100040341	100040341	0	0	0	0	0	0	0	0	NA	NA	NA
LOC100040342	100040342	0.07	0.22	0	0.07	119.18	128.16	129.66	128.3	0.253584	0.592025	-0.0593527
LOC100040343	100040343	0	0	0	0	0.15	0	0	0.08	0.146241	0.292481	0
LOC100040344	100040344	7.22	7.17	6.35	5.7	7.36	9.43	8.79	8.87	0.0871049	0.249634	0.0696723
LOC100040345	100040345	0	0	0	0	0	0	0	0	NA	NA	NA
LOC100040346	100040346	0	0	0	0	0	0	0	0	NA	NA	NA
LOC100040347	100040347	0	0	0	0	0	0	0	0	NA	NA	NA
LOC100040348	100040348	0	0	0	0	0	0	0	0	NA	NA	NA
LOC100040349	100040349	0	0	0	0	0.04	0.03	0.01	0	0	0	0
LOC100040350	100040350	0	0	0.01	0	0.04	0.03	0.03	0.03	0	0	0
LOC100040351	100040351	0	0	0	0	0	0	0	0	NA	NA	NA
LOC100040352	100040352	0.08	0	0	0.19	0	0	0.26	0.38	-1.05763	0.815054	-1.05311
LOC100040353	100040353	0.43	0.36	0.06	0.17	0.47	0.24	0.1	0.19	1.43912	0.897035	1.52838
LOC100040354	100040354	0	0	0	0	0.02	0.03	0.04	0.03	0	0	0
LOC100040355	100040355	0	0	0	0	0	0.43	0.39	0.43	-0.490869	0.981737	-0.931287
LOC100040356	100040356	1.95	0.49	0.6	0.66	3.16	1.33	0.45	0.5	1.37353	1.34522	1.64881
LOC100040357	100040357	0	0	0	0	0	0	0	0	NA	NA	NA
LOC100040358	100040358	0.17	0.38	0.17	0.19	0.34	0	0.17	0.19	0.2685	0.925402	0.305808
LOC100040359	100040359	0	0	0	0	0	0	0	0	NA	NA	NA
LOC100040360	100040360	0.07	0.07	0.06	0	0.13	0.22	0.06	0	0.379004	0.536224	0.292782
LOC100040361	100040361	0.34	0	0.33	0.36	22.44	16.24	23.48	20.99	-0.56011	0.876231	-0.210832
LOC100040363	100040363	0	0	0	0	0	0	0	0	NA	NA	NA
LOC100040364	100040364	0	0	0	0	0	0	0	0	NA	NA	NA
LOC100040365	100040365	0	0	0	0	0	0	0	0	NA	NA	NA
LOC100040366	100040366	0	0	0	0	0.05	0.08	0.08	0.08	0	0	0
LOC100040368	100040368	0.06	0.3	0.22	0.34	0.08	0.18	0.33	0.4	-1.04814	0.639313	-1.05703
LOC100040369	100040369	0	0	0	0	0.1	0	0.1	0.22	-0.284376	0.568752	0
LOC100040370	100040370	0	0	0	0	0	0	0	0	NA	NA	NA
LOC100040371	100040371	0	0	0	0	0	0	0	0	NA	NA	NA
LOC100040372	100040372	0	0	0	0	0	0	0	0	NA	NA	NA
LOC100040373	100040373	0	0	0	0	0	0	0	0	NA	NA	NA
LOC100040374	100040374	0	0	0	0	0	0	0	0	NA	NA	NA
LOC100040375	100040375	2.02	2.1	2.33	1.91	1.88	1.88	2.47	1.5	-0.0342915	0.325386	-0.0591866
LOC100040376	100040376	0	0	0	0	0	0	0	0	NA	NA	NA
LOC100040377	100040377	0	0	0	0	0	0	0	0	NA	NA	NA
LOC100040378	100040378	0	0	0	0	0	0	0	0	NA	NA	NA
LOC100040379	100040379	0	0	0	0	0	0	0	0	NA	NA	NA
LOC100040380	100040380	0	0	0	0	0	0	0	0	NA	NA	NA
LOC100040381	100040381	0	0	0	0	0	0	0	0	NA	NA	NA
LOC100040382	100040382	0	0	0	0	0	0	0	0	NA	NA	NA
LOC100040383	100040383	0	0	0	0	0	0	0	0	NA	NA	NA
LOC100040384	100040384	0	0	0	0	0	0	0	0	NA	NA	NA
LOC100040385	100040385	0	0	0	0	0.62	0.45	0.51	0.56	-0.00843271	0.24403	0
LOC100040386	100040386	0	0	0	0	0	0	0	0	NA	NA	NA
LOC100040387	100040387	0	0	0	0	0	0	0	0	NA	NA	NA
LOC100040388	100040388	0	0	0	0	0.44	0.39	0.35	0.39	0.0825372	0.165074	0.165586
LOC100040389	100040389	0	0	0	0	0	0	0	0	NA	NA	NA
LOC100040390	100040390	0	0	0	0	0	0	0	0	NA	NA	NA
LOC100040391	100040391	0	0	0	0	0	0	0	0	NA	NA	NA
LOC100040392	100040392	0	0	0	0	0	0	0	0	NA	NA	NA
LOC100040394	100040394	0	0	0	0.08	3.99	3.42	4.11	4.02	-0.0689872	0.111314	-0.147909
LOC100040395	100040395	0	0	0	0	0	0	0	0	NA	NA	NA
LOC100040396	100040396	0	0	0	0	0	0	0	0	NA	NA	NA
LOC100040397	100040397	0	0	0	0	0.14	0	0	0	NA	NA	NA
LOC100040398	100040398	0	0	0	0	0	0	0	0	NA	NA	NA
LOC100040399	100040399	0	0	0	0	0	0	0	0	NA	NA	NA
LOC100040400	100040400	0	0	0	0	0	0	0	0	NA	NA	NA
LOC100040401	100040401	0	0	0	0	0	0.03	0	0.01	0	0	0
LOC100040402	100040402	0	0.07	0	0	0.06	0.07	0	0.06	0	0	0
LOC100040403	100040403	0	0	0	0	0.03	0.02	0.01	0.03	0	0	0
LOC100040404	100040404	0	0	0	0	0	0	0.12	0	NA	NA	NA
LOC100040405	100040405	0	0	0	0	0	0	0	0	NA	NA	NA
LOC100040407	100040407	0.03	0.02	0.02	0.02	0.06	0.04	0.05	0.04	0	0	0
LOC100040408	100040408	0	0	0	0	0	0	0	0	NA	NA	NA
LOC100040409	100040409	0	0	0	0	0	0	0	0	NA	NA	NA
LOC100040410	100040410	0	0	0	0	0	0	0	0	NA	NA	NA
LOC100040411	100040411	0	0	0	0	0	0	0	0	NA	NA	NA
LOC100040412	100040412	0	0	0	0	0	0	0	0	NA	NA	NA
LOC100040413	100040413	0.15	0.08	0.18	0	2.73	2.29	2.14	2	0.0709008	0.264981	0.281286
LOC100040414	100040414	0.14	0	0.27	0	0.68	0	0.41	0.75	-0.781128	1.5748	-0.802319
LOC100040415	100040415	0	0	0	0	0	0	0	0	NA	NA	NA
LOC100040416	100040416	0.5	0.21	0.5	0.48	119.31	161.5	156.9	188.09	-0.451916	0.519605	-0.29741
LOC100040417	100040417	0	0	0	0	0	0	0	0	NA	NA	NA
LOC100040418	100040418	0	0	0	0	0	0	0	0	NA	NA	NA
LOC100040419	100040419	0	0	0	0	0.01	0	0	0	NA	NA	NA
LOC100040420	100040420	0	0	0	0	0	0.1	0	0	NA	NA	NA
LOC100040421	100040421	0	0	0	0	0	0	0	0	NA	NA	NA
LOC100040422	100040422	0	0.09	0	0	0	0	0	0	NA	NA	NA
LOC100040423	100040423	0	0	0	0	0	0	0	0	NA	NA	NA
LOC100040424	100040424	0	0	0	0	0	0	0	0	NA	NA	NA
LOC100040425	100040425	0	0	0	0	0	0	0	0	NA	NA	NA
LOC100040426	100040426	1.08	0.74	1.49	1.34	151.59	174.44	266.03	382.28	-0.816058	0.273965	-0.989932
LOC100040427	100040427	0.16	0.12	0.02	0	0.16	0.16	0.02	0	0.574313	0.207519	0.584963
LOC100040428	100040428	0	0	0	0	0	0	0	0	NA	NA	NA
LOC100040429	100040429	0	0	0	0	0	0	0	0	NA	NA	NA
LOC100040430	100040430	0	0	0	0	0	0	0	0.25	NA	NA	NA
LOC100040431	100040431	0.05	0.02	0.04	0.03	0.04	0.03	0.05	0.04	0	0	0
LOC100040432	100040432	0	0	0	0	1.48	1.44	1.56	1.73	-0.085163	0.124933	-0.172119
LOC100040433	100040433	0	0	0	0	0	0	0	0	NA	NA	NA
LOC100040435	100040435	0	0	0	0	0	0	0	0	NA	NA	NA
LOC100040436	100040436	0	0	0	0	0	0	0	0	NA	NA	NA
LOC100040437	100040437	0.19	0.14	0.16	0.21	0.12	0.11	0	0.17	-0.175508	0.498012	0.0524674
LOC100040438	100040438	0	0	0	0	0	0	0	0	NA	NA	NA
LOC100040439	100040439	0.51	0.45	0.37	0.21	4.74	3.45	4.49	4.56	0.30956	0.634581	-0.0737641
LOC100040440	100040440	0.02	0.01	0.01	0.02	0.03	0.02	0.02	0.05	0	0	0
LOC100040441	100040441	0	0	0.01	0	0.02	0.02	0.02	0.01	0	0	0
LOC100040442	100040442	0.03	0.02	0.02	0.02	0.02	0.01	0.03	0.03	0	0	0
LOC100040443	100040443	0	0	0	0	3.54	3.95	5.65	5.16	-0.265005	0.327956	-0.529329
LOC100040444	100040444	0	0	0	0	0	0	0	0	NA	NA	NA
LOC100040445	100040445	0	0	0	0	0	0	0	0	NA	NA	NA
LOC100040446	100040446	0	0	0	0	0.07	0	0.06	0.07	0	0	0
LOC100040447	100040447	0	0	0	0	0	0	0	0	NA	NA	NA
LOC100040448	100040448	0	0	0	0	0	0	0	0	NA	NA	NA
LOC100040449	100040449	0	0	0	0	0	0	0	0	NA	NA	NA
LOC100040450	100040450	0	0	0	0	0	0	0	0	NA	NA	NA
LOC100040451	100040451	0	0	0	0	0.28	0	0	0	NA	NA	NA
LOC100040452	100040452	0	0	0	0	0	0	0	0	NA	NA	NA
LOC100040453	100040453	0	0.03	0	0	0.7	0.74	0.97	1	-0.226258	0.261679	-0.422379
LOC100040454	100040454	0	0	0	0	0	0	0	0	NA	NA	NA
LOC100040455	100040455	0	0	0	0	0.01	0.01	0	0.01	0	0	0
LOC100040456	100040456	0	0	0	0	0	0	0	0	NA	NA	NA
LOC100040457	100040457	0	0	0	0	0	0	0	0	NA	NA	NA
LOC100040458	100040458	0	0	0	0	0	0	0	0	NA	NA	NA
LOC100040459	100040459	0	0	0	0	0	0	0	0	NA	NA	NA
LOC100040460	100040460	0	0	0	0	0	0	0	0	NA	NA	NA
LOC100040461	100040461	0	0	0	0	0	0	0	0	NA	NA	NA
LOC100040462	100040462	0	0	0	0	0	0	0	0	NA	NA	NA
LOC100040463	100040463	0	0	0	0	0	0	0	0	NA	NA	NA
LOC100040464	100040464	0	0	0	0	0	0	0	0	NA	NA	NA
LOC100040465	100040465	0.48	0.49	0.25	0.53	0.55	0.49	0.41	0.49	0.312926	0.478338	0.258734
LOC100040466	100040466	0	0	0	0	0	0.08	0	0.08	0	0	0
LOC100040467	100040467	0	0	0	0	0	0	0	0	NA	NA	NA
LOC100040468	100040468	0	0	0	0	0	0	0	0	NA	NA	NA
LOC100040469	100040469	0	0	0	0	0	0	0	0	NA	NA	NA
LOC100040470	100040470	0	0	0	0	0.03	0.02	0.02	0.02	0	0	0
LOC100040471	100040471	0.04	0.03	0	0	4.48	4.62	1.73	1.76	0.691261	0.79824	1.39369
LOC100040472	100040472	0	0	0	0	0	0.02	0	0	NA	NA	NA
LOC100040473	100040473	0.12	0	0	0.13	0.12	0	0	0.13	-0.0577386	0.370397	0
LOC100040474	100040474	0	0	0	0	0	0	0	0	NA	NA	NA
LOC100040475	100040475	0	0	0	0	0	0	0	0	NA	NA	NA
LOC100040476	100040476	0	0	0	0	0	0	0	0	NA	NA	NA
LOC100040477	100040477	0	0	0	0	0	0	0	0	NA	NA	NA
LOC100040478	100040478	0	0	0	0	0	0	0	0.02	NA	NA	NA
LOC100040479	100040479	0	0	0	0	0	0	0	0	NA	NA	NA
LOC100040480	100040480	0.22	0	0	0.12	1.12	0.74	0.44	0.49	0.704284	0.718715	0.986194
LOC100040481	100040481	0.1	0.04	0	0.07	0.1	0.07	0	0	0	0	0
LOC100040482	100040482	0	0	0	0	0	0	0	0	NA	NA	NA
LOC100040483	100040483	0	0	0	0	0	0	0	0	NA	NA	NA
LOC100040484	100040484	0	0	0	0	0	0	0	0	NA	NA	NA
LOC100040485	100040485	6.73	6.9	9.87	9.12	6.62	6.76	10.05	9.01	-0.492919	0.0997356	-0.494403
LOC100040486	100040486	0	0	0	0	0.04	0.04	0	0.04	0	0	0
LOC100040487	100040487	0	0	0	0	0	0	0	0	NA	NA	NA
LOC100040488	100040488	0	0	0	0	0.82	0.78	1.01	1.03	-0.175439	0.206688	-0.350497
LOC100040489	100040489	0	0	0	0	0	0	0	0	NA	NA	NA
LOC100040490	100040490	0	0	0	0	0	0	0	0	NA	NA	NA
LOC100040491	100040491	0	0	0	0	0	0	0	0	NA	NA	NA
LOC100040492	100040492	0	0	0	0	0.02	0.03	0.01	0.01	0	0	0
LOC100040493	100040493	0	0	0	0	0	0	0	0	NA	NA	NA
LOC100040494	100040494	0	0	0	0	0	0	0	0	NA	NA	NA
LOC100040495	100040495	0	0	0	0	0	0	0	0	NA	NA	NA
LOC100040496	100040496	0.21	0.17	0.21	0.23	2.35	3.29	2.45	2.54	-0.0307403	0.33133	0.148811
LOC100040497	100040497	0	0	0	0	0.01	0	0.01	0	0	0	0
LOC100040498	100040498	0	0	0	0	0	0	0.13	0	NA	NA	NA
LOC100040499	100040499	0	0	0	0	0	0	0	0	NA	NA	NA
LOC100040500	100040500	0.16	0.21	0.04	0.02	5.4	5.66	1.85	1.87	1.22291	0.433839	1.59637
LOC100040501	100040501	0.07	0.03	0.05	0.03	0.09	0.08	0.12	0.12	-0.131517	0.151863	0
LOC100040502	100040502	0.07	0.1	0.43	0.17	7.12	6.66	14.01	12.37	-1.18491	0.619063	-0.951625
LOC100040503	100040503	0	0	0	0	0	0	0	0	NA	NA	NA
LOC100040504	100040504	0	0	0	0	0	0	0	0	NA	NA	NA
LOC100040505	100040505	0.27	0.21	0.37	0.28	3.03	3.11	5.75	6.19	-0.696718	0.304164	-0.927375
LOC100040506	100040506	0	0	0	0	0	0	0	0	NA	NA	NA
LOC100040507	100040507	0	0	0	0	0	0	0	0	NA	NA	NA
LOC100040508	100040508	0.76	0.82	1.08	1.37	1.42	0.74	1.66	2.3	-0.777192	0.610077	-0.777286
LOC100040509	100040509	0	0	0	0	0	0	0	0	NA	NA	NA
LOC100040510	100040510	0	0	0	0	0	0	0	0	NA	NA	NA
LOC100040511	100040511	0.17	0.14	0.17	0.1	0.25	0.14	0.21	0.05	0.305598	0.231653	0.401363
LOC100040513	100040513	0	0	0	0	0	0	0	0	NA	NA	NA
LOC100040514	100040514	0	0	0	0	0	0	0	0	NA	NA	NA
LOC100040515	100040515	0	0	0	0	0	0	0	0	NA	NA	NA
LOC100040516	100040516	0	0	0	0	0	0	0	0	NA	NA	NA
LOC100040517	100040517	0	0	0	0	0	0	0	0	NA	NA	NA
LOC100040518	100040518	0.81	1.03	1.1	0.67	0.61	0.95	1.34	0.54	-0.0353705	0.917975	-0.102362
LOC100040519	100040519	3.97	2.87	6.68	5.86	25.42	22.51	46.28	43.71	-0.900595	0.120703	-0.904588
LOC100040520	100040520	0	0	0	0	0	0	0	0	NA	NA	NA
LOC100040521	100040521	0	0	0	0	0	0	0	0	NA	NA	NA
LOC100040522	100040522	0	0	0	0	0	0	0	0	NA	NA	NA
LOC100040523	100040523	0	0	0	0	0	0	0	0	NA	NA	NA
LOC100040524	100040524	0.07	0	0	0	0	0	0	0	NA	NA	NA
LOC100040525	100040525	0	0	0	0	1.29	1.32	1.02	1.07	0.160432	0.185829	0.320547
LOC100040526	100040526	0.16	0	0.08	0	0.39	0.34	0.55	0.26	0.142284	0.508122	0
LOC100040527	100040527	0	0	0.12	0	0.12	0.13	0	0	0.0946279	0.286256	0
LOC100040528	100040528	0	0	0	0	0	0	0	0	NA	NA	NA
LOC100040529	100040529	0	0	0	0	0	0	0	0	NA	NA	NA
LOC100040531	100040531	0	0	0	0	3.23	3.41	2.6	2.67	0.166489	0.192934	0.33338
LOC100040532	100040532	1.42	0.31	1.56	1.56	57.65	48.81	84.83	80.79	-0.937779	0.961642	-0.641235
LOC100040533	100040533	0	0	0	0	0	0	0	0	NA	NA	NA
LOC100040534	100040534	0	0	0	0	0	0	0	0	NA	NA	NA
LOC100040535	100040535	0	0	0	0	0	0	0	0	NA	NA	NA
LOC100040536	100040536	0	0	0	0	0.53	1.37	0.06	0.07	1.54552	1.87022	2.24793
LOC100040537	100040537	0	0	0	0	0	0	0	0	NA	NA	NA
LOC100040538	100040538	12.56	13.05	10.26	8.93	17.32	17	14.39	11.14	0.42907	0.174765	0.422358
LOC100040539	100040539	0	0	0	0	0	0	0	0	NA	NA	NA
LOC100040540	100040540	1.12	0.98	1.33	0.98	252.98	286.84	436.74	442.61	-0.415367	0.357544	-0.702143
LOC100040541	100040541	0	0	0	0	0	0	0	0	NA	NA	NA
LOC100040542	100040542	0.01	0	0	0	0.09	0.06	0.07	0.09	0	0	0
LOC100040543	100040543	0.12	0.14	0	0	0.19	0.14	0	0	NA	NA	NA
LOC100040544	100040544	0	0	0	0	0	0	0	0	NA	NA	NA
LOC100040545	100040545	0	0	0	0	0	0.01	0	0	NA	NA	NA
LOC100040546	100040546	0	0	0	0	3.52	3.62	1.01	1.3	0.819675	0.955662	1.62803
LOC100040547	100040547	0	0	0	0	0	0	0	0	NA	NA	NA
LOC100040548	100040548	0	0	0	0	0.21	0	0	0	NA	NA	NA
LOC100040549	100040549	0	0	0	0	0	0	0	0	NA	NA	NA
LOC100040550	100040550	0	0	0	0	0.01	0.01	0.01	0.01	0	0	0
LOC100040551	100040551	2.35	1.92	4.07	3.32	471.94	447.5	634.37	654.65	-0.639501	0.182151	-0.48901
LOC100040552	100040552	0	0	0	0	0	0	0	0	NA	NA	NA
LOC100040553	100040553	0	0	0	0	0	0	0	0	NA	NA	NA
LOC100040554	100040554	0	0	0	0	0	0	0	0	NA	NA	NA
LOC100040555	100040555	0	0	0	0	0	0	0	0	NA	NA	NA
LOC100040556	100040556	0	0	0	0	2.92	2.92	0.81	0.97	0.859972	0.998669	1.71409
LOC100040557	100040557	0	0	0	0	0	0	0	0	NA	NA	NA
LOC100040558	100040558	0.06	0.07	0	0	0.03	0.07	0	0	NA	NA	NA
LOC100040559	100040559	0.06	0	0.06	0	0.3	0.2	0.25	0.13	0.221131	0.294301	0.347923
LOC100040560	100040560	0	0	0	0	0	0	0	0	NA	NA	NA
LOC100040561	100040561	2.02	1.43	1.72	1.75	4.55	3.58	3.8	4.29	-0.015136	0.301896	0.00249386
LOC100040562	100040562	0	0	0	0	0.02	0	0	0.02	0	0	0
LOC100040563	100040563	0	0	0	0	1.85	2	1.48	1.52	0.179464	0.209418	0.359896
LOC100040564	100040564	0	0	0	0	0	0	0	0	NA	NA	NA
LOC100040565	100040565	0	0	0	0	0.35	0.3	0.39	0.35	-0.0946279	0.112567	-0.187086
LOC100040566	100040566	0	0	0	0	0	0	0	0	NA	NA	NA
LOC100040567	100040567	0	0	0	0	0	0	0	0	NA	NA	NA
LOC100040568	100040568	0	0	0.08	0	0	0	0.08	0.09	NA	NA	NA
LOC100040569	100040569	0.22	0.41	0.18	0.17	0.31	0.35	0.19	0.17	0.826921	0.426595	0.86148
LOC100040570	100040570	0	0	0	0	0	0	0	0	NA	NA	NA
LOC100040571	100040571	0	0	0	0	0	0	0	0	NA	NA	NA
LOC100040572	100040572	0.26	0.14	0	0	0.13	0.07	0	0	NA	NA	NA
LOC100040573	100040573	0	0	0	0	0	0	0	0	NA	NA	NA
LOC100040574	100040574	0.02	0	0	0	0	0	0.03	0	0	0	0
LOC100040575	100040575	0	0	0	0	0	0	0	0	NA	NA	NA
LOC100040576	100040576	0.25	0.22	0.12	0.12	0.34	0.28	0.17	0.17	0.913314	0.150143	0.910203
LOC100040577	100040577	0	0	0	0	0	0	0	0	NA	NA	NA
LOC100040578	100040578	0	0	0	0	0.03	0.02	0.04	0.04	0	0	0
LOC100040579	100040579	0	0	0	0	0	0.01	0.01	0	0	0	0
LOC100040580	100040580	0	0	0.01	0.01	0.04	0.02	0.05	0.02	0	0	0
LOC100040581	100040581	0	0	0	0	0	0	0	0	NA	NA	NA
LOC100040582	100040582	0	0	0	0	0	0	0	0	NA	NA	NA
LOC100040583	100040583	0	0	0	0	0	0	0	0.04	NA	NA	NA
LOC100040584	100040584	0	0	0.02	0.11	0	0.06	0.08	0.11	-0.0687518	0.0793877	0
LOC100040585	100040585	0	0	0	0	0	0	0	0	NA	NA	NA
LOC100040586	100040586	0	0	0	0	0	0	0	0	NA	NA	NA
LOC100040587	100040587	0	0	0	0	0	0	0	0	NA	NA	NA
LOC100040588	100040588	0	0	0	0	0	0.02	0	0.02	0	0	0
LOC100040589	100040589	0	0	0.01	0	0	0.02	0.03	0.01	0	0	0
LOC100040590	100040590	0	0	0.1	0.12	0	0.12	0	0	0	0.214767	0
LOC100040591	100040591	0.03	0.04	0.03	0.08	0.03	0.12	0.21	0	-0.201839	0.592161	0
LOC100040592	100040592	0	0	0	0	0	0	0	0	NA	NA	NA
LOC100040593	100040593	0	0	0	0	0	0	0	0	NA	NA	NA
LOC100040594	100040594	0.12	0	0	0	0	0	0	0.13	-0.0288693	0.264023	0
LOC100040595	100040595	0	0	0	0	0	0	0	0	NA	NA	NA
LOC100040596	100040596	0	0	0	0	1.35	1.36	1.05	1.1	0.167168	0.194401	0.333956
LOC100040597	100040597	0	0	0	0.08	0.07	0	0.07	0.15	-0.146241	0.292481	0
LOC100040598	100040598	0	0	0	0	0	0	0	0	NA	NA	NA
LOC100040599	100040599	0	0	0	0	0.01	0.01	0	0.01	0	0	0
LOC100040600	100040600	0	0.08	0	0	0	0	0	0	NA	NA	NA
LOC100040601	100040601	0	0	0	0	0	0	0	0	NA	NA	NA
LOC100040602	100040602	0	0	0	0	2.27	2.22	1.9	1.65	0.171197	0.2097	0.338896
LOC100040603	100040603	0	0	0	0	1.86	2.02	1.49	1.52	0.182569	0.214011	0.366293
LOC100040604	100040604	0	0	0	0	0	0	0	0	NA	NA	NA
LOC100040605	100040605	0	0	0.06	0	98.21	121.62	110.94	111.56	-0.0128193	0.123527	-0.017806
LOC100040606	100040606	0	0	0	0	0	0	0	0	NA	NA	NA
LOC100040607	100040607	0	0	0	0	0	0	0	0	NA	NA	NA
LOC100040608	100040608	1.16	1.37	1.97	2.27	1.08	1.37	1.97	2.18	-0.757476	0.0827428	-0.752525
LOC100040609	100040609	0.25	0.12	0.25	0.17	1.44	0.86	1.2	0.93	-0.08809	0.318014	0.0663425
LOC100040610	100040610	0	0	0	0	1.17	0.96	1.25	1.17	-0.0952054	0.13454	-0.184154
LOC100040611	100040611	0	0	0	0	65.44	76.4	90.38	96.87	-0.202077	0.238711	-0.400701
LOC100040612	100040612	0	0	0	0	0	0	0	0	NA	NA	NA
LOC100040613	100040613	0	0	0	0	0	0	0	0	NA	NA	NA
LOC100040614	100040614	0	0	0	0.16	0.14	0	0	0.32	-0.467679	0.937452	-0.263034
LOC100040615	100040615	0	0	0	0	0	0.01	0	0	NA	NA	NA
LOC100040616	100040616	0	0	0	0	0.23	0	0.12	0	0.23465	0.4693	0
LOC100040617	100040617	0	0	0	0	0	0	0	0	NA	NA	NA
LOC100040618	100040618	0	0	0	0	0	0	0.01	0.02	NA	NA	NA
LOC100040619	100040619	0	0	0.02	0	0.14	0.13	0.24	0.16	-0.269292	0.367123	-0.0703893
LOC100040620	100040620	0	0	0	0	0	0	0	0	NA	NA	NA
LOC100040621	100040621	0	0	0	0	0	0	0	0	NA	NA	NA
LOC100040622	100040622	0.11	0	0.11	0	0.45	0	0.45	0.25	-0.330482	0.660964	-0.532495
LOC100040623	100040623	0.16	0.45	0.33	0.63	0.29	0.54	0.49	0.63	-0.627236	0.353458	-0.530515
LOC100040624	100040624	0	0	0	0	0	0	0	0.03	NA	NA	NA
LOC100040625	100040625	0	0	0	0	0	0	0	0	NA	NA	NA
LOC100040626	100040626	0.02	0	0.04	0	0.12	0.02	0.04	0.02	0.0657586	0.131517	0
LOC100040628	100040628	0	0	0	0	0.12	0.14	0.25	0.14	-0.264723	0.529447	0
LOC100040629	100040629	0	0	0	0	0	0	0	0	NA	NA	NA
LOC100040631	100040631	0	0	0	0	3.18	3.34	2.58	2.68	0.154818	0.178887	0.309809
LOC100040632	100040632	0	0	0	0	0	0	0	0	NA	NA	NA
LOC100040633	100040633	49.61	54.82	80.6	83.53	1142.05	1243.52	1789.65	1799.59	-0.622258	0.070408	-0.592041
LOC100040634	100040634	0.13	0.05	0.09	0.1	0.3	0.24	0.35	0.4	-0.145212	0.466012	-0.384664
LOC100040635	100040635	0	0	0	0	0	0	0	0	NA	NA	NA
LOC100040636	100040636	0	0	0	0	0	0	0	0	NA	NA	NA
LOC100040637	100040637	0	0	0	0	0	0	0	0	NA	NA	NA
LOC100040638	100040638	0	0	0	0	0.07	0.02	0	0.02	0	0	0
LOC100040639	100040639	0	0	0	0	0	0	0	0	NA	NA	NA
LOC100040640	100040640	8.61	6.04	7.02	8.06	16.99	10.88	14.61	15.34	-0.0998948	0.413575	-0.0827449
LOC100040641	100040641	0	0	0	0	0.35	0.3	0.39	0.35	-0.0946279	0.112567	-0.187086
LOC100040642	100040642	0	0	0	0	0	0	0	0	NA	NA	NA
LOC100040643	100040643	0	0	0	0	0	0.08	0	0	NA	NA	NA
LOC100040644	100040644	0.01	0	0.01	0.01	0	0.01	0.01	0.01	0	0	0
LOC100040645	100040645	0	0	0	0	0	0	0	0	NA	NA	NA
LOC100040646	100040646	0	0	0	0	0	0	0	0	NA	NA	NA
LOC100040647	100040647	0	0	0	0	1.71	1.53	2.12	2.34	-0.230761	0.293757	-0.46105
LOC100040648	100040648	0	0	0	0	0	0	0	0.07	NA	NA	NA
LOC100040649	100040649	0	0	0	0	0	0	0	0	NA	NA	NA
LOC100040650	100040650	0	0	0	0	0	0	0	0	NA	NA	NA
LOC100040651	100040651	0	0	0	0	0	0	0	0	NA	NA	NA
LOC100040652	100040652	0	0	0	0	0.02	0.02	0.04	0.04	0	0	0
LOC100040653	100040653	0	0	0.06	0.05	0.02	0.02	0.06	0.07	0	0	0
LOC100040654	100040654	0	0	0	0.06	0	0	0	0	NA	NA	NA
LOC100040655	100040655	0	0	0	0	0	0	0	0	NA	NA	NA
LOC100040656	100040656	0	0	0	0	0	0	0	0	NA	NA	NA
LOC100040657	100040657	0	0	0	0	0	0	0	0	NA	NA	NA
LOC100040658	100040658	0	0	0	0	0	0	0	0	NA	NA	NA
LOC100040659	100040659	0	0	0	0	0	0	0	0	NA	NA	NA
LOC100040660	100040660	0	0	0	0	0	0	0	0	NA	NA	NA
LOC100040661	100040661	7.33	8.16	9.81	8.89	62.18	67.1	71.67	71.26	-0.208938	0.14939	-0.158932
LOC100040662	100040662	0	0	0	0	0	0	0	0	NA	NA	NA
LOC100040663	100040663	0	0	0	0	0	0	0	0	NA	NA	NA
LOC100040664	100040664	0	0	0	0	0	0	0	0	NA	NA	NA
LOC100040665	100040665	3.82	5.15	7.11	6.36	16.51	19.42	24.27	23.71	-0.511129	0.284523	-0.452698
LOC100040666	100040666	0	0	0	0	1.19	1.02	0.79	0.73	0.268409	0.313078	0.539975
LOC100040667	100040667	0.06	0.07	0.02	0.03	0.07	0.06	0.02	0.04	0	0	0
LOC100040668	100040668	0	0	0	0	0	0	0	0	NA	NA	NA
LOC100040669	100040669	0	0	0	0	0	0	0	0	NA	NA	NA
LOC100040670	100040670	0	0	0	0	0	0	0	0	NA	NA	NA
LOC100040671	100040671	0	0	0	0	0.05	0.04	0.06	0.06	0	0	0
LOC100040672	100040672	0	0	0	0	0	0	0	0	NA	NA	NA
LOC100040673	100040673	0	0	0	0	0	0	0	0	NA	NA	NA
LOC100040674	100040674	0	0	0	0	0	0	0	0	NA	NA	NA
LOC100040675	100040675	0.33	0.24	0.43	0.24	0.54	0.24	0.87	0.48	-0.517482	0.427433	-0.581396
LOC100040676	100040676	0	0	0	0	0	0	0	0	NA	NA	NA
LOC100040677	100040677	0	0	0	0	0.09	0.04	0.07	0.04	0	0	0
LOC100040678	100040678	0	0	0	0	0.51	0.56	1.17	1.11	-0.54625	0.636603	-1.09142
LOC100040679	100040679	0.04	0	0	0	0	0	0	0	NA	NA	NA
LOC100040680	100040680	0	0	0	0	0	0	0	0	NA	NA	NA
LOC100040681	100040681	0	0	0.04	0	0.47	0.43	0.47	0.38	0.0445843	0.0891686	0.0161197
LOC100040682	100040682	0	0	0	0	1.47	1.31	1.89	1.88	-0.220934	0.263201	-0.43948
LOC100040684	100040684	0	0	0	0	0	0	0	0	NA	NA	NA
LOC100040685	100040685	0	0	0	0	0.25	0	0	0	NA	NA	NA
LOC100040686	100040686	0.02	0.02	0.02	0.02	0.11	0.12	0.09	0.08	0.100134	0.126474	0
LOC100040687	100040687	0	0	0	0	0	0	0	0	NA	NA	NA
LOC100040688	100040688	0	0	0.01	0.02	0.01	0.01	0.01	0.01	0	0	0
LOC100040689	100040689	0	0	0	0	0	0	0	0	NA	NA	NA
LOC100040690	100040690	0	0	0	0	0.01	0	0	0	NA	NA	NA
LOC100040691	100040691	1.9	2.52	1.73	1.48	7.03	7.67	6.37	7.03	0.292747	0.316792	0.20303
LOC100040692	100040692	0	0	0	0	0.01	0	0	0	NA	NA	NA
LOC100040693	100040693	0	0	0	0	0	0	0	0	NA	NA	NA
LOC100040694	100040694	0	0	0	0	0.22	0	0	0	NA	NA	NA
LOC100040695	100040695	0	0	0	0	0	0	0	0	NA	NA	NA
LOC100040696	100040696	0	0	0	0	0	0	0	0	NA	NA	NA
LOC100040697	100040697	0	0	0	0	0	0	0	0	NA	NA	NA
LOC100040698	100040698	0	0	0	0	0	0	0	0	NA	NA	NA
LOC100040699	100040699	0	0	0	0	0.01	0	0.01	0	0	0	0
LOC100040700	100040700	0.01	0.01	0.03	0	0.04	0.06	0.06	0.04	0	0	0
LOC100040701	100040701	0	0	0	0	0	0	0	0	NA	NA	NA
LOC100040702	100040702	0	0	0	0	0	0	0	0	NA	NA	NA
LOC100040703	100040703	0.05	0	0.1	0	2.59	2.74	3.26	3.37	-0.157623	0.182516	-0.323
LOC100040704	100040704	0	0	0.11	0	0.32	0.23	0.33	0.24	-0.0608245	0.0572992	-0.306103
LOC100040705	100040705	0	0	0	0	0.03	0	0.04	0	0	0	0
LOC100040706	100040706	0	0	0	0	0.51	0.56	1.17	1.11	-0.54625	0.636603	-1.09142
LOC100040707	100040707	0.1	0	0.1	0.11	0.2	0.21	0.29	0.11	0.0648323	0.621751	-0.258312
LOC100040708	100040708	0	0	0	0	17.38	19.08	22.42	19.35	-0.0969076	0.180553	-0.196153
LOC100040710	100040710	0	0	0	0	0	0	0	0	NA	NA	NA
LOC100040711	100040711	0	0	0	0	0	0	0	0.15	NA	NA	NA
LOC100040712	100040712	0	0	0	0	0	0	0	0	NA	NA	NA
LOC100040714	100040714	0	0	0	0	0	0	0	0	NA	NA	NA
LOC100040715	100040715	0	0	0	0	0	0	0	0	NA	NA	NA
LOC100040716	100040716	0	0	0	0	0.05	0.05	0.05	0.05	0	0	0
LOC100040717	100040717	0	0	0	0	0.01	0	0.01	0	0	0	0
LOC100040718	100040718	0	0	0	0	0.09	0	0	0	NA	NA	NA
LOC100040719	100040719	0	0	0	0	0	0	0	0	NA	NA	NA
LOC100040720	100040720	0	0	0	0	0	0	0	0	NA	NA	NA
LOC100040721	100040721	0.25	0.18	0.25	0.09	4.96	4.57	4.53	3.4	0.351371	0.376123	0.268258
LOC100040722	100040722	0	0	0	0	0	0	0	0	NA	NA	NA
LOC100040723	100040723	0	0	0	0	0	0	0	0	NA	NA	NA
LOC100040724	100040724	0	0	0	0	0	0	0	0	NA	NA	NA
LOC100040725	100040725	0	0	0	0	0	0	0	0	NA	NA	NA
LOC100040726	100040726	0	0	0	0	0.02	0.01	0.02	0.03	0	0	0
LOC100040727	100040727	0	0	0	0	0	0	0	0	NA	NA	NA
LOC100040728	100040728	0	0	0	0	0	0	0	0	NA	NA	NA
LOC100040729	100040729	0	0	0	0	0	0	0	0	NA	NA	NA
LOC100040730	100040730	0	0	0	0	0	0	0.02	0	NA	NA	NA
LOC100040731	100040731	0	0	0	0	0	0	0	0	NA	NA	NA
LOC100040732	100040732	0	0	0	0	0	0	0	0	NA	NA	NA
LOC100040733	100040733	0	0	0	0	0	0	0	0	NA	NA	NA
LOC100040734	100040734	0.04	0	0.04	0.13	0.29	0.14	0.33	0.37	-0.491756	0.62626	-0.888355
LOC100040735	100040735	0	0	0	0	0.21	0.12	0	0.12	0.267597	0.535195	0
LOC100040736	100040736	8.4	8.95	4.15	4.21	7.94	8.75	3.55	3.93	1.10535	0.0674011	1.10366
LOC100040737	100040737	0	0	0	0	0	0.18	0	0	NA	NA	NA
LOC100040738	100040738	0	0	0	0	0.01	0.01	0.02	0.01	0	0	0
LOC100040739	100040739	0	0	0	0	0	0	0	0	NA	NA	NA
LOC100040740	100040740	0	0	0	0	0	0	0	0	NA	NA	NA
LOC100040741	100040741	0	0.11	0	0	0	0	0	0	NA	NA	NA
LOC100040742	100040742	0.22	0.1	0.39	0.44	0.22	0.05	0.31	0.29	-1.24857	0.73477	-1.27723
LOC100040743	100040743	0	0	0	0	0	0	0	0	NA	NA	NA
LOC100040744	100040744	0	0	0	0	0	0	0	0	NA	NA	NA
LOC100040745	100040745	1.17	0.4	0.86	1.02	62.12	61.88	101.18	101.46	-0.580889	0.747341	-0.70375
LOC100040746	100040746	0	0	0	0	0.01	0	0	0.01	0	0	0
LOC100040747	100040747	0	0	0	0	0	0.11	0	0	NA	NA	NA
LOC100040748	100040748	0	0	0	0	0	0	0	0	NA	NA	NA
LOC100040749	100040749	0.01	0	0	0	0.01	0.02	0.03	0.02	0	0	0
LOC100040750	100040750	0	0	0	0	0	0.1	0	0	NA	NA	NA
LOC100040751	100040751	0	0	0	0	0	0	0	0	NA	NA	NA
LOC100040752	100040752	0	0	0	0	0	0	0	0	NA	NA	NA
LOC100040753	100040753	0	0	0	0	0	0	0	0	NA	NA	NA
LOC100040754	100040754	0	0	0	0	0	0	0	0	NA	NA	NA
LOC100040755	100040755	0	0	0	0	0	0	0	0	NA	NA	NA
LOC100040757	100040757	0.09	0	0.09	0.2	0.18	0	0.09	0.2	-0.288001	0.892061	-0.536053
LOC100040758	100040758	0	0	0	0	0	0	0	0	NA	NA	NA
LOC100040759	100040759	0	0	0	0	0.02	0.01	0.03	0.03	0	0	0
LOC100040760	100040760	0	0	0	0	0	0	0	0	NA	NA	NA
LOC100040762	100040762	0	0	0.07	0	0	0	0	0	NA	NA	NA
LOC100040763	100040763	0	0	0	0	0	0.11	0	0	NA	NA	NA
LOC100040764	100040764	0	0	0	0	0.22	0	0.14	0	0.163019	0.326038	0
LOC100040765	100040765	0	0	0	0	0.88	0.56	0.75	0.97	-0.140486	0.448101	-0.25634
LOC100040766	100040766	0.96	0.84	1.37	1.04	0.97	0.95	1.4	1.16	-0.409672	0.129234	-0.417943
LOC100040767	100040767	0	0	0	0	0	0	0	0	NA	NA	NA
LOC100040768	100040768	0.02	0	0.01	0	0.03	0.02	0.01	0.01	0	0	0
LOC100040769	100040769	1.11	0.25	0.99	0.12	0.44	0.61	0.67	0.36	0.344527	0.734977	0.171422
LOC100040770	100040770	0	0	0	0	0.01	0.01	0	0	NA	NA	NA
LOC100040771	100040771	0	0	0	0	0	0	0	0	NA	NA	NA
LOC100040773	100040773	0.04	0.02	0.04	0.02	0.17	0.2	0.16	0.13	0.177238	0.299023	0.104337
LOC100040774	100040774	0	0	0	0	0	0	0	0	NA	NA	NA
LOC100040775	100040775	0	0	0	0.06	0.88	0.91	0.94	0.85	0.000811618	0.0790265	-0.0475657
LOC100040777	100040777	0	0	0	0	0	0	0	0	NA	NA	NA
LOC100040778	100040778	2.23	2.97	5.1	4.61	15.85	15.83	25.79	25.84	-0.809258	0.258274	-0.73399
LOC100040779	100040779	0	0	0	0	0	0	0	0	NA	NA	NA
LOC100040780	100040780	0	0	0	0	0	0	0	0	NA	NA	NA
LOC100040781	100040781	0	0	0	0	0	0	0	0	NA	NA	NA
LOC100040782	100040782	0	0	0	0	0	0	0	0	NA	NA	NA
LOC100040784	100040784	0	0	0	0	0	0	0	0	NA	NA	NA
LOC100040785	100040785	0.94	0.73	2.92	0.73	3.07	2.5	5.44	1.91	-0.518062	0.900462	-0.603442
LOC100040786	100040786	0	0	0	0	0	0	0	0	NA	NA	NA
LOC100040787	100040787	0	0	0	0	0	0	0	0	NA	NA	NA
LOC100040788	100040788	0	0.08	0.02	0	0	0.06	0	0	0	0	0
LOC100040789	100040789	0	0	0	0	0	0	0	0	NA	NA	NA
LOC100040790	100040790	0	0	0	0	0	0	0	0	NA	NA	NA
LOC100040791	100040791	0	0	0	0	0	0	0	0	NA	NA	NA
LOC100040792	100040792	0	0	0	0	0	0	0	0	NA	NA	NA
LOC100040793	100040793	0	0	0	0	0	0	0	0	NA	NA	NA
LOC100040794	100040794	0	0	0	0	0	0	0	0.03	NA	NA	NA
LOC100040795	100040795	0	0.02	0	0.02	0.55	0.53	0.79	0.73	-0.246081	0.285222	-0.485427
LOC100040796	100040796	0	0	0	0	0	0	0	0	NA	NA	NA
LOC100040797	100040797	0	0	0	0	0	0	0	0	NA	NA	NA
LOC100040798	100040798	5.53	5.16	5.83	4.23	15.06	15.88	16.16	16.02	0.0240321	0.179079	-0.0209863
LOC100040799	100040799	1.3	1.19	1.18	1.36	1.32	1.14	1.21	1.57	-0.09728	0.287364	-0.103998
LOC100040800	100040800	0.55	0.67	0.85	0.6	0.55	0.74	0.78	0.6	-0.167578	0.466562	-0.173115
LOC100040801	100040801	0	0	0	0	0	0	0	0	NA	NA	NA
LOC100040803	100040803	2.11	1.8	1.4	1.98	1.72	1.64	1.4	2.32	0.0627163	0.480294	0.0341363
LOC100040804	100040804	0.11	0.06	0	0.25	1.6	1.16	1.48	2	-0.464456	0.715023	-0.348275
LOC100040805	100040805	0.02	0.02	0.04	0.01	0.11	0.05	0.1	0.07	0.0343759	0.0687518	0
LOC100040806	100040806	0	0	0	0	0	0	0	0	NA	NA	NA
LOC100040807	100040807	0	0	0	0	0	0	0	0	NA	NA	NA
LOC100040808	100040808	0	0	0	0	0	0	0	0	NA	NA	NA
LOC100040809	100040809	0	0	0.02	0.02	0.24	0.19	0.15	0.14	0.279661	0.337167	0.104337
LOC100040810	100040810	0	0	0	0	0	0	0	0	NA	NA	NA
LOC100040811	100040811	0	0	0	0.07	0.13	0.14	0.13	0.36	-0.340643	0.681285	-0.485427
LOC100040812	100040812	0.94	1.55	1.4	1.03	3.29	3.33	4.88	3.67	-0.17353	0.547928	-0.269355
LOC100040813	100040813	0	0	0	0	0	0	0	0	NA	NA	NA
LOC100040814	100040814	0.02	0	0	0	3.79	3.66	6.85	6.44	-0.417281	0.482093	-0.831161
LOC100040815	100040815	0	0	0	0	0	0	0	0	NA	NA	NA
LOC100040816	100040816	0	0	0	0	0.21	0.23	0	0.11	0.53363	0.616188	0.137504
LOC100040817	100040817	0	0	0	0	0	0	0	0	NA	NA	NA
LOC100040818	100040818	0.02	0.02	0	0	0.02	0	0.02	0	0	0	0
LOC100040820	100040820	0	0	0	0	0	0	0	0	NA	NA	NA
LOC100040822	100040822	0	0	0	0	0	0	0	0	NA	NA	NA
LOC100040823	100040823	0.69	0.98	1.18	1.74	262.27	259.6	375.67	374.52	-0.662379	0.161839	-0.524561
LOC100040824	100040824	0	0	0	0	0	0	0	0	NA	NA	NA
LOC100040825	100040825	0	0	0	0	4.34	4.58	6.95	4.15	-0.13427	0.3695	-0.315444
LOC100040826	100040826	0.54	0.4	0.45	0.35	1.64	1.62	1.88	1.81	0.0246617	0.236846	-0.0963261
LOC100040827	100040827	0	0	0	0	0	0	0	0	NA	NA	NA
LOC100040828	100040828	0	0	0	0	0	0	0	0.11	NA	NA	NA
LOC100040829	100040829	0	0	0	0	0	0	0	0	NA	NA	NA
LOC100040831	100040831	0.01	0	0	0	0.61	0.63	0.79	0.85	-0.201289	0.233676	-0.391768
LOC100040832	100040832	0	0	0	0	0	0	0	0	NA	NA	NA
LOC100040833	100040833	0	0	0	0	0	0	0	0	NA	NA	NA
LOC100040834	100040834	0	0	0	0	0	0	0	0	NA	NA	NA
LOC100040835	100040835	0.07	0.07	0.06	0.07	6.67	7.64	8.79	9.22	-0.167343	0.200064	-0.328105
LOC100040836	100040836	0	0	0.06	0.12	3.89	3.94	4.29	3.99	-0.105609	0.122263	-0.111645
LOC100040837	100040837	0	0	0	0	0	0	0	0	NA	NA	NA
LOC100040838	100040838	0	0	0	0	0.01	0	0.01	0	0	0	0
LOC100040839	100040839	0	0	0	0	0	0	0	0	NA	NA	NA
LOC100040840	100040840	0.09	0.16	0.33	0.16	0.42	0.71	0.79	0.62	-0.609595	0.884962	-0.461331
LOC100040841	100040841	0	0	0	0	0	0	0	0	NA	NA	NA
LOC100040842	100040842	0.1	0	0.2	0.11	0.3	0	0.19	0.44	-0.654011	1.19877	-1.23266
LOC100040843	100040843	0	0	0	0	0	0	0	0	NA	NA	NA
LOC100040844	100040844	0	0	0	0	0.03	0	0	0	NA	NA	NA
LOC100040845	100040845	0	0	0	0	0	0	0	0	NA	NA	NA
LOC100040846	100040846	0	0	0	0	0	0.05	0	0	NA	NA	NA
LOC100040847	100040847	1.49	2.13	2.77	2.91	4.76	6.24	7.58	7.79	-0.584013	0.25274	-0.525877
LOC100040849	100040849	0	0	0	0	0.11	0.12	0	0	NA	NA	NA
LOC100040850	100040850	0	0	0	0	0	0	0	0	NA	NA	NA
LOC100040851	100040851	0	0	0	0	0	0	0	0	NA	NA	NA
LOC100040852	100040852	0	0	0	0	0	0	0	0	NA	NA	NA
LOC100040853	100040853	0.08	0.12	0.06	0.11	1.31	1.27	0.81	1.18	0.231286	0.313088	0.364054
LOC100040854	100040854	0	0	0	0	0	0	0	0	NA	NA	NA
LOC100040855	100040855	0	0	0	0	0	0	0	0	NA	NA	NA
LOC100040856	100040856	0	0	0	0	0	0.08	0	0	NA	NA	NA
LOC100040857	100040857	0	0	0.09	0.03	0	0	0	0	NA	NA	NA
LOC100040858	100040858	0	0	0	0	0	0	0	0	NA	NA	NA
LOC100040859	100040859	0	0	0	0	0	0	0	0	NA	NA	NA
LOC100040860	100040860	0	0	0	0	0	0	0	0	NA	NA	NA
LOC100040861	100040861	0	0	0	0	0	0	0	0	NA	NA	NA
LOC100040862	100040862	1.05	1.15	0.37	0.48	0.87	1.29	0.49	0.74	1.09883	0.342742	1.06774
LOC100040863	100040863	0	0	0	0	0	0	0	0	NA	NA	NA
LOC100040864	100040864	0	0	0	0	0.02	0	0.02	0.02	0	0	0
LOC100040865	100040865	0	0	0	0	0	0	0	0	NA	NA	NA
LOC100040866	100040866	0	0	0	0	0.01	0	0.01	0.01	0	0	0
LOC100040867	100040867	0	0	0	0	0	0	0	0	NA	NA	NA
LOC100040868	100040868	0	0	0	0	0	0	0	0	NA	NA	NA
LOC100040870	100040870	0	0	0	0	0	0	0	0	NA	NA	NA
LOC100040871	100040871	0	0	0	0	0	0	0	0	NA	NA	NA
LOC100040872	100040872	0	0	0	0	0.07	0	0	0	NA	NA	NA
LOC100040873	100040873	0	0	0	0	0	0	0	0	NA	NA	NA
LOC100040874	100040874	0.07	0.07	0.14	0	0	0.12	0.07	0	-0.0555981	0.312229	0
LOC100040875	100040875	0	0	0	0	0	0	0	0	NA	NA	NA
LOC100040876	100040876	0	0	0	0	0	0	0	0	NA	NA	NA
LOC100040877	100040877	0.03	0.06	0.07	0.08	0.07	0.04	0.13	0.04	-0.0946279	0.189256	0
LOC100040878	100040878	0.74	0.54	0.37	0.82	1.73	1.91	2.22	1.77	0.0368428	0.706938	-0.0742938
LOC100040879	100040879	0.05	0.03	0.07	0.02	0.04	0.05	0.08	0.07	0	0	0
LOC100040880	100040880	0	0	0	0	0	0	0	0	NA	NA	NA
LOC100040881	100040881	0.06	0	0	0	0.06	0	0	0	NA	NA	NA
LOC100040882	100040882	0	0	0	0	0	0	0	0	NA	NA	NA
LOC100040883	100040883	0.05	0.02	0.11	0.02	0.72	0.74	1.12	0.86	-0.247936	0.274677	-0.463711
LOC100040885	100040885	0	0	0	0	0	0	0	0	NA	NA	NA
LOC100040886	100040886	0	0	0	0	0	0	0	0	NA	NA	NA
LOC100040887	100040887	2	2.3	2.18	1.78	6.18	6.71	8.42	5.23	0.0396792	0.397588	-0.0348254
LOC100040888	100040888	0	0.16	0	0.31	0.28	0.16	0.28	0.16	-0.238549	0.477098	-0.321928
LOC100040889	100040889	0	0	0	0	0	0	0	0	NA	NA	NA
LOC100040890	100040890	0	0	0	0	0	0	0.04	0	NA	NA	NA
LOC100040891	100040891	0	0	0	0	0	0	0	0	NA	NA	NA
LOC100040892	100040892	0	0	0	0	0	0	0	0	NA	NA	NA
LOC100040893	100040893	0.04	0.04	0.06	0.05	0.05	0.03	0.05	0.05	0	0	0
LOC100040894	100040894	0	0	0	0	0	0	0	0	NA	NA	NA
LOC100040895	100040895	0	0	0	0	0	0	0	0	NA	NA	NA
LOC100040897	100040897	0	0	0	0	0	0	0	0	NA	NA	NA
LOC100040898	100040898	0.39	0.08	0.17	0.04	0.33	0.4	0.43	0.16	0.534499	0.853546	0.584963
LOC100040899	100040899	0	0	0	0	0	0	0	0	NA	NA	NA
LOC100040900	100040900	0	0	0	0	0	0	0	0	NA	NA	NA
LOC100040901	100040901	0	0	0	0	0	0	0	0	NA	NA	NA
LOC100040902	100040902	0	0	0	0	0	0	0	0	NA	NA	NA
LOC100040903	100040903	2.16	2.99	2.15	2.06	1.97	3	2.71	1.96	0.174552	0.501962	0.188578
LOC100040905	100040905	0	0	0	0	0	0	0	0	NA	NA	NA
LOC100040906	100040906	0	0	0	0	0	0	0	0	NA	NA	NA
LOC100040907	100040907	0	0	0	0	0	0	0	0	NA	NA	NA
LOC100040908	100040908	0	0	0	0	0	0	0	0	NA	NA	NA
LOC100040909	100040909	0	0	0	0	0	0	0	0	NA	NA	NA
LOC100040911	100040911	0	0	0	0	0	0	0	0	NA	NA	NA
LOC100040912	100040912	0	0	0	0	0	0	0	0	NA	NA	NA
LOC100040913	100040913	0	0	0	0	0	0	0	0	NA	NA	NA
LOC100040914	100040914	0.19	0.24	0.65	0.62	0.22	0.28	0.56	0.79	-1.49701	0.196232	-1.49426
LOC100040915	100040915	0	0	0	0	0.01	0.01	0.01	0.01	0	0	0
LOC100040916	100040916	0	0	0	0.09	0.08	0.09	0.31	0.17	-0.599451	0.777384	-0.510962
LOC100040917	100040917	0	0	0	0	0	0	0	0	NA	NA	NA
LOC100040918	100040918	0	0	0	0	0.04	0.04	0.05	0.07	0	0	0
LOC100040919	100040919	0	0	0	0	0.01	0	0	0	NA	NA	NA
LOC100040920	100040920	0	0	0	0	0	0	0	0	NA	NA	NA
LOC100040921	100040921	0	0	0	0	0.02	0.01	0	0.01	0	0	0
LOC100040922	100040922	0	0	0	0	0	0	0	0	NA	NA	NA
LOC100040923	100040923	0	0	0	0	0	0	0	0	NA	NA	NA
LOC100040924	100040924	12.17	12.05	12.12	9.35	17.52	16.33	18.84	15.1	0.0950286	0.201339	0.0676467
LOC100040925	100040925	0.02	0	0	0	0	0	0.02	0	0	0	0
LOC100040926	100040926	0	0	0	0	0	0	0	0	NA	NA	NA
LOC100040927	100040927	0.14	0.16	0.14	0.31	2.99	3.29	2.97	3.44	-0.252209	0.469143	-0.060121
LOC100040928	100040928	0	0	0	0	0	0	0	0	NA	NA	NA
LOC100040929	100040929	0.11	0.12	0.52	0.25	21.03	20.19	30.69	24.33	-1.02858	0.87202	-0.428634
LOC100040930	100040930	0	0	0	0	0	0	0	0	NA	NA	NA
LOC100040931	100040931	0	0	0	0	0	0	0	0	NA	NA	NA
LOC100040933	100040933	0	0	0	0	0.11	0.08	0.04	0.04	0.0343759	0.0687518	0
LOC100040934	100040934	0	0	0	0	0	0	0	0	NA	NA	NA
LOC100040935	100040935	0	0	0	0	0	0	0	0	NA	NA	NA
LOC100040936	100040936	0	0	0	0	0.54	0.51	0.3	0.41	0.290718	0.400074	0.564498
LOC100040937	100040937	0	0	0	0	0	0	0	0	NA	NA	NA
LOC100040938	100040938	0	0	0	0	0	0.02	0	0	NA	NA	NA
LOC100040939	100040939	0.01	0	0	0	0.02	0.01	0.03	0.04	0	0	0
LOC100040940	100040940	0	0	0	0	0	0	0	0	NA	NA	NA
LOC100040941	100040941	0	0	0	0	0	0	0.04	0	NA	NA	NA
LOC100040942	100040942	0.11	0	0	0	0.22	0	0.11	0	0.284376	0.481466	0
LOC100040943	100040943	0	0	0	0	0	0	0	0	NA	NA	NA
LOC100040944	100040944	0	0	0	0	0.01	0	0	0.01	0	0	0
LOC100040945	100040945	0	0	0	0	0	0.01	0	0	NA	NA	NA
LOC100040946	100040946	0.01	0	0	0	0.03	0.02	0.03	0.04	0	0	0
LOC100040947	100040947	0	0	0	0	0	0	0	0	NA	NA	NA
LOC100040948	100040948	0	0	0	0	0.01	0.02	0.01	0.02	0	0	0
LOC100040949	100040949	0	0	0	0	0	0	0	0	NA	NA	NA
LOC100040950	100040950	1.25	2.22	1.09	1.08	1.19	1.72	1.14	1.2	0.454608	0.434579	0.500429
LOC100040951	100040951	0	0	0	0	0	0	0	0	NA	NA	NA
LOC100040952	100040952	0	0	0	0	0.02	0	0	0	NA	NA	NA
LOC100040955	100040955	0	0	0	0	0	0	0	0	NA	NA	NA
LOC100040956	100040956	0	0	0	0	0	0	0	0	NA	NA	NA
LOC100040957	100040957	0	0	0.07	0	0.07	0.08	0.15	0.24	-0.461999	0.601017	-0.201634
LOC100040958	100040958	0.11	0.25	0.33	0.12	0.56	0.37	0.22	0.12	0.611586	1.48246	0.707447
LOC100040959	100040959	0	0	0	0	0	0	0	0	NA	NA	NA
LOC100040960	100040960	0	0	0	0	0	0	0	0	NA	NA	NA
LOC100040961	100040961	0	0	0	0	3.85	3.57	4.37	4.31	-0.113635	0.13615	-0.226276
LOC100040962	100040962	0	0	0	0	0.02	0	0.04	0	0	0	0
[truncated: 31,115 more rows]
